# Supplementary material for: Disentangling environmental drivers of subarctic dinocyst assemblage compositional change during the Holocene
Source: Copernicus journal article supplement (doi:10.5194/cp-19-2027-2023), 2023-10-26
Supplement: Supplementary file 1 [file S1_Dataset421.xlsx]

## Sheet: Information
Local calibration dataset of the Baffin Bay area containing 421 modern sample sites (a subset of the original n=1968 (de Vernal et al., 2020) dataset)
Raw data:
	coor: Coordinates of sample sites
	envi: Environmantal variables at sample sites
	taxa: Abundances (percentages) of dinoflagellate cysts at sample sites
Envi variables:		SSSsummer: Sea surface salinity in summer; [psu]
		SSTsummer: Sea surface temperature in summer; [°C]
		SeaIce: Sea ice cover duration; [months/year]
		PPSpring: Primary productivity in spring; [mgC/m^2/day]
		PPSummer: Primary productivity in summer: [mgC/m^2/day]
		PPAnnual: Primary productivity during one year: [mgC/m^2/day]
The original dinocyst dataset n=1968 (de Vernal et al., 2020) is archived at GEOTOP (http://www.geotop.uqam.ca)

## Sheet: coor
Obsname	LATI	LONG	REGION
B080	70.52	-64.52	Baffin
B081	71.33	-64.27	Baffin
B082	68.45	-63.53	Baffin
B256	77.27	-74.32	Baffin
B257	76.8	-71.85	Baffin
Z543	74.82	-97.18	Baffin
Z546	74.5	-92.58	Baffin
Y566	76.96	-72.48	Baffin
Y567	78.34	-74.7	Baffin
Y568	76.98	-75.05	Baffin
Y569	77.85	-74.79	Baffin
Y570	76.27	-74.66	Baffin
Y571	76.38	-77.41	Baffin
Y572	78.99	-73.33	Baffin
Y573	77.34	-76.48	Baffin
Y574	76.99	-75	Baffin
Y575	76.29	-72.03	Baffin
Y576	76.37	-77.28	Baffin
Y577	78.35	-74.48	Baffin
Y578	77.01	-72.63	Baffin
Y579	75.22	-74.94	Baffin
Y580	76.28	-74.24	Baffin
Y686	76.29	-74.16	Baffin
Y687	76.29	-74.25	Baffin
Y688	76.41	-77.46	Baffin
Y689	76.84	-74.98	Baffin
Y690	76.8	-74.94	Baffin
Y691	76.96	-72.41	Baffin
Y692	76.31	-71.87	Baffin
Y693	77.01	-72.34	Baffin
Y694	77.08	-76.65	Baffin
Y695	77.79	-75.21	Baffin
Y696	75.26	-76.08	Baffin
Y697	75.58	-70.79	Baffin
Z705	75.85	-76.44	Baffin
Z706	75.22	-78.71	Baffin
Z707	76.22	-74.66	Baffin
Z708	76.19	-71.06	Baffin
Z710	76.58	-69.08	Baffin
Z714	76.54	-69.08	Baffin
Z716	76.56	-69.21	Baffin
Z717	76.53	-69.13	Baffin
Z718	76.53	-69.1	Baffin
Z720	75.22	-78.71	Baffin
Z721	75.16	-97	Baffin
Z722	76.99	-98	Baffin
Z723	77.26	-96.52	Baffin
Z726	77.07	-89.52	Baffin
Z727	75.74	-93.5	Baffin
Z728	75	-93	Baffin
Z729	74.25	-85.98	Baffin
Z730	74.24	-83.06	Baffin
Z731	73.49	-85.01	Baffin
Z732	73.11	-84.85	Baffin
Z733	74.54	-99.47	Baffin
Z740	76.12	-86.47	Baffin
Z743	78.3	-104	Baffin
F1230	74.28	-85.6	Baffin
F1231	74.19	-81.2	Baffin
Z1480	74.26	-90.99	Baffin
B1483	68.86	-53.33	Baffin
B1484	69.17	-51.4	Baffin
B1487	68.08	-58.06	Baffin
B1488	70.97	-61.3	Baffin
B1489	69.03	-59.32	Baffin
B1490	69	-59.77	Baffin
B1491	71	-58.77	Baffin
B1492	70.09	-52.89	Baffin
B1495	75.47	-70.64	Baffin
B1496	77.29	-74.34	Baffin
B1497	76.98	-71.89	Baffin
B1498	76.33	-71.42	Baffin
B1499	76.57	-73.96	Baffin
B1500	75.58	-78.63	Baffin
B1501	74.02	-77.12	Baffin
B1502	74.09	-78.72	Baffin
B1503	68.23	-57.62	Baffin
B1504	70.46	-64.66	Baffin
B1505	76.13	-72.36	Baffin
B1506	76.03	-74.38	Baffin
B1507	76	-73.17	Baffin
B1508	75.8	-69.33	Baffin
B1509	75.75	-68.47	Baffin
B1510	75.39	-73.57	Baffin
B1511	73.78	-74.13	Baffin
B1512	73.95	-73.08	Baffin
B1513	74.13	-72.13	Baffin
B1514	74.78	-69.63	Baffin
B1515	75.23	-68.08	Baffin
B1516	75.65	-67	Baffin
B1517	75.8	-66.55	Baffin
B1518	75.45	-71.85	Baffin
B1519	75.93	-71.05	Baffin
B1520	75.47	-69.08	Baffin
B1521	75.34	-69.92	Baffin
B1522	75.2	-70.74	Baffin
B1523	74.93	-72.33	Baffin
B1524	74.85	-75.85	Baffin
B1525	74.72	-73.78	Baffin
B1526	74.62	-72	Baffin
B1527	74.55	-71	Baffin
B1528	74.43	-70.15	Baffin
B1529	74.77	-67.75	Baffin
B1531	73.69	-64.56	Baffin
B1532	73.7	-67	Baffin
B1533	72.2	-65.97	Baffin
B1534	77	-74.08	Baffin
B1535	76.67	-74.08	Baffin
B1536	76.23	-70.5	Baffin
B1537	76.16	-71.4	Baffin
B1538	75.62	-70.08	Baffin
B1539	75.55	-71	Baffin
B1540	75.47	-71.87	Baffin
B1541	75.28	-74.45	Baffin
B1542	75.22	-75.3	Baffin
B1543	75.01	-72.72	Baffin
B1544	75.67	-71.4	Baffin
B1545	68.4	-55.9	Baffin
B1546	69.16	-51.53	Baffin
B1547	69.22	-51.94	Baffin
B1548	69.26	-52.42	Baffin
B1549	68.34	-56.74	Baffin
B1550	69.93	-63.06	Baffin
B1957	68.31	-63.8	Baffin
B1958	71.69	-69.11	Baffin
B1959	71.86	-70.95	Baffin
B1960	69.52	-64.65	Baffin
B1961	67.61	-61.97	Baffin
B1962	67.47	-63.59	Baffin
B1963	70.64	-66.25	Baffin
B1964	70.7	-66.39	Baffin
B1965	71.87	-70.87	Baffin
B1966	71.92	-70.46	Baffin
B1967	72.43	-72.77	Baffin
B1968	72.81	-77.68	Baffin
B1969	72.85	-77.44	Baffin
B1970	72.82	-77.43	Baffin
B1971	71.4	-70.15	Baffin
B1972	71.92	-70.41	Baffin
B1973	72.46	-72.91	Baffin
B1974	70.21	-65.32	Baffin
B1975	68.15	-63.67	Baffin
B1976	67.78	-59.58	Baffin
B1977	68.14	-57.27	Baffin
B1978	68.4	-55.97	Baffin
B1979	68.83	-54.44	Baffin
B1980	68.82	-53.03	Baffin
B1981	69.23	-52.3	Baffin
B1982	69.33	-51.66	Baffin
B1983	69	-51.74	Baffin
B1984	69.25	-51.28	Baffin
B1985	67.7	-58.05	Baffin
B1988	70.82	-54.48	Baffin
B1989	71.69	-58.96	Baffin
B1990	71.91	-59.28	Baffin
B1991	71.09	-57.57	Baffin
B1992	71.18	-56.6	Baffin
B1993	71	-56.48	Baffin
B1994	70.42	-57.84	Baffin
B1995	70.53	-57.77	Baffin
B1996	69.75	-51.57	Baffin
B1997	69.96	-51.71	Baffin
B1998	70.59	-55.07	Baffin
B1999	70.75	-54.88	Baffin
B2010	70.76	-56.75	Baffin
B2011	73.27	-57.85	Baffin
B2012	73.59	-58.09	Baffin
B2013	75.99	-66.32	Baffin
B2014	75.98	-65.44	Baffin
B2015	75.83	-62.52	Baffin
B2016	75.77	-64.14	Baffin
B2017	73.98	-61.79	Baffin
B2018	75.22	-59.82	Baffin
B2019	75.12	-60.29	Baffin
B2020	75	-58.72	Baffin
B2021	73.7	-57.24	Baffin
B2022	72.82	-60.05	Baffin
B2071	68.84	-66.27	Baffin
B2073	68.97	-59.57	Baffin
B2086	68.25	-57.21	Baffin
B2087	68.56	-54.72	Baffin
B2088	68.63	-53.95	Baffin
B2089	68.66	-54.17	Baffin
B2090	68.34	-55.35	Baffin
B2091	68.36	-56.58	Baffin
B2092	68.76	-57.56	Baffin
B2093	69.06	-57.19	Baffin
B2094	69.5	-57.17	Baffin
B2105	77.28	-74.36	Baffin
B2106	76.35	-77.54	Baffin
B2107	76.31	-71.11	Baffin
B2108	74.95	-67.32	Baffin
B2132	70.3	-66.09	Baffin
Z2134	74.12	-83.37	Baffin
B2140	71.43	-70.44	Baffin
Z2144	68.49	-103.42	Baffin
Z2145	68.31	-102.94	Baffin
Z2146	68.31	-101.77	Baffin
Z2147	68.32	-100.8	Baffin
Z2148	71.46	-101.27	Baffin
Z2149	71.87	-102.72	Baffin
B2151	69.51	-55.99	Baffin
B2152	69.5	-54.91	Baffin
B2153	69.66	-55.6	Baffin
B2154	69.15	-53.42	Baffin
B2155	68.84	-52.34	Baffin
B2156	69.05	-52.43	Baffin
B2157	68.13	-54.21	Baffin
B2163	68.49	-54.02	Baffin
2187	68.9	-59.48	Baffin
2188	68.9	-59.41	Baffin
2189	68.88	-59.32	Baffin
2190	76.92	-71.96	Baffin
2191	76.66	-71.46	Baffin
2192	76.58	-71.68	Baffin
2193	76.55	-71.43	Baffin
2194	76.36	-71.34	Baffin
2195	76.5	-71.64	Baffin
2196	76.47	-71.65	Baffin
2197	73.55	-66.91	Baffin
2198	73.75	-70.92	Baffin
2199	73.83	-72.48	Baffin
2200	73.83	-72.57	Baffin
2201	74.07	-77.45	Baffin
2202	70.06	-70.05	Baffin
2203	69.9	-70.23	Baffin
2204	69.98	-69.96	Baffin
2205	70.14	-69.74	Baffin
2206	70.17	-69.64	Baffin
2207	70.22	-69	Baffin
2208	70.46	-67.97	Baffin
2209	70.6	-67.89	Baffin
2210	70.69	-67.7	Baffin
H130	63.03	-81.08	Hudson
H131	63.03	-81.08	Hudson
H132	63.5	-83.27	Hudson
H133	62.37	-84.47	Hudson
H134	61.59	-86.32	Hudson
H135	62.69	-87.74	Hudson
H136	60.61	-81.18	Hudson
H137	60.2	-86.86	Hudson
H138	60.36	-86.03	Hudson
H139	58.71	-84.85	Hudson
H140	57.9	-83.34	Hudson
H141	55.38	-77.68	Hudson
H142	55.48	-77.96	Hudson
H143	55.1	-80.5	Hudson
H144	55.59	-81.76	Hudson
H145	57.97	-86.77	Hudson
H146	56.24	-76.37	Hudson
H147	56.39	-76.37	Hudson
H148	56.22	-76.45	Hudson
H1109	60.17	-79	Hudson
H1110	60.34	-81.99	Hudson
H1111	60.5	-85	Hudson
H1112	60.84	-87.45	Hudson
H1113	60.84	-87.45	Hudson
H1114	60.84	-90.01	Hudson
H1115	60.92	-91.78	Hudson
H1116	65.14	-81.35	Hudson
H1117	62.66	-75.49	Hudson
H1118	63.83	-75.5	Hudson
H1119	62.44	-75.5	Hudson
H1120	63.85	-79.56	Hudson
H1325	60.17	-79	Hudson
H1326	60.33	-82	Hudson
H1328	60.66	-87.45	Hudson
H1329	60.92	-91.78	Hudson
H1330	65.14	-81.34	Hudson
H1331	62.25	-71.92	Hudson
H1332	64.03	-79.22	Hudson
H1333	62.76	-79	Hudson
H1334	60.18	-79.29	Hudson
H1335	58.42	-78.36	Hudson
H1336	56.39	-76.58	Hudson
H1337	55.4	-77.98	Hudson
H1338	54.72	-80.73	Hudson
H1339	55.44	-80.53	Hudson
H1340	56.72	-80.81	Hudson
H1341	59.05	-87.49	Hudson
H1342	58.73	-91.49	Hudson
H1343	60	-91.97	Hudson
H1344	60.44	-89.36	Hudson
H1345	61.04	-86.22	Hudson
H1370	58.65	-90.28	Hudson
H1371	55.26	-77.89	Hudson
D2044	61.3	-71.06	Hudson
D2045	63.05	-74.32	Hudson
G037	50.25	-64.08	Davis
G038	50.21	-64.08	Davis
G039	50.26	-64.07	Davis
G040	50.18	-61.97	Davis
G041	50.11	-61.91	Davis
G043	50.14	-61.87	Davis
G044	50.07	-61.84	Davis
G045	50.12	-61.81	Davis
G046	50.1	-61.8	Davis
G047	50.02	-61.6	Davis
G048	50.08	-61.38	Davis
G050	50.12	-61.32	Davis
G061	50.12	-58.73	Davis
L087	62.65	-53.88	Davis
L088	62.52	-59.45	Davis
L089	64.4	-57.42	Davis
L093	58.36	-57.46	Davis
L094	58.76	-57.12	Davis
L152	58.37	-57.51	Davis
S158	56.11	-58.91	Davis
S159	54.71	-56.45	Davis
S160	54.72	-55.58	Davis
L162	54.82	-52.87	Davis
L163	55.03	-52.13	Davis
L164	54.9	-52.75	Davis
Z735	60.95	-66.43	Davis
G1347	50.05	-66.38	Davis
G1348	50.04	-66.38	Davis
G1349	50.05	-66.38	Davis
G1350	50.06	-66.37	Davis
G1351	50.09	-66.33	Davis
G1352	50.23	-63.95	Davis
B1482	64.15	-51.43	Davis
B1485	63.57	-54.49	Davis
B1486	64.45	-52.78	Davis
B1493	61.46	-58.04	Davis
L1708	59.05	-63.87	Davis
L1709	59.09	-63.43	Davis
L1710	58.32	-63.54	Davis
L1711	58.48	-63.22	Davis
L1712	58.5	-62.69	Davis
L1713	57.47	-62.44	Davis
L1714	57.57	-62.06	Davis
L1715	57.57	-62.05	Davis
L1716	57.57	-61.94	Davis
L1717	57.61	-61.9	Davis
L1718	56.44	-61.99	Davis
L1719	56.42	-61.74	Davis
L1720	56.4	-61.22	Davis
B1986	66.17	-57.12	Davis
B1987	66.92	-56.83	Davis
L2000	61.27	-60.87	Davis
L2001	61.34	-61.12	Davis
L2002	63.44	-51.78	Davis
L2003	62.97	-51.61	Davis
L2004	62.97	-51.3	Davis
L2005	64.19	-54.17	Davis
L2006	65.21	-55.53	Davis
L2008	64.47	-52.93	Davis
L2009	64.36	-52.96	Davis
L2023	63.55	-52.22	Davis
L2024	62.98	-51.5	Davis
L2025	61.75	-53	Davis
D2026	59.94	-65.94	Davis
D2027	60.93	-65.97	Davis
B2028	58.36	-57.47	Davis
B2029	58.76	-61.88	Davis
B2030	57.66	-60.87	Davis
B2031	56.25	-59.68	Davis
S2032	54.48	-56.07	Davis
S2033	54.41	-56.01	Davis
L2034	54.57	-50.68	Davis
G2041	50.04	-66.38	Davis
G2042	50.22	-58.47	Davis
G2043	58.49	-63.15	Davis
D2046	61.1	-66.69	Davis
L2047	59.05	-63.65	Davis
L2069	65	-59	Davis
L2070	64	-58	Davis
L2072	62.54	-52.63	Davis
L2073	52.96	-51.29	Davis
L2075	64.96	-56.44	Davis
L2077	63.52	-52.51	Davis
L2078	63.57	-52.09	Davis
L2079	62.87	-52.05	Davis
L2080	62.61	-50.94	Davis
L2081	62.49	-50.7	Davis
L2082	64.56	-53.01	Davis
L2083	64.91	-52.97	Davis
B2084	65.99	-56.52	Davis
B2085	66.5	-54.45	Davis
L2109	63.37	-58.42	Davis
L2110	63.35	-58.34	Davis
L2111	63.35	-58.39	Davis
L2115	56.89	-52.69	Davis
L2117	53.38	-50.25	Davis
L2118	52.67	-51.97	Davis
L2119	62.55	-56.47	Davis
L2128	59.05	-63.86	Davis
L2142	56.89	-52.69	Davis
B2158	62.05	-50.82	Davis
B2161	66.63	-54.21	Davis
L2164	62.38	-50.83	Davis
L090	59.49	-45.87	Labrador
L091	58.92	-47.09	Labrador
L092	58.21	-48.36	Labrador
A099	57.98	-45.9	Labrador
A100	58.79	-43.97	Labrador
A103	59.86	-39.67	Labrador
A104	60.29	-40.22	Labrador
A105	62.32	-41.02	Labrador
A106	62.54	-38.83	Labrador
A107	62.91	-32.18	Labrador
A108	62.77	-30.36	Labrador
A127	52.29	-35.24	Labrador
L151	53.33	-45.26	Labrador
L153	59.15	-48.38	Labrador
A168	59.49	-39.31	Labrador
A171	59.68	-30.36	Labrador
A174	55.75	-30.23	Labrador
A175	53.06	-33.53	Labrador
L178	50.21	-45.69	Labrador
A533	67.15	-30.82	Labrador
A534	67.14	-31.88	Labrador
C1955	50.21	-45.69	Labrador
L2076	60.51	-47.17	Labrador
L2116	54.29	-48	Labrador
L2150	60.23	-46.97	Labrador
L2160	59.51	-45.41	Labrador
A2165	59.81	-39.8	Labrador
L2166	57.71	-48.01	Labrador
L2167	58.05	-47.04	Labrador
L2168	58.6	-46.38	Labrador

## Sheet: envi
Obsname	SSSsummer	SSTsummer	SeaIce	PPSpring	PPSummer	PPAnnual
B080	29.92	3.21	8.98	238	455	2094
B081	28.75	2.51	8.98	243.67	478.33	2181
B082	30.82	3.23	9.1	281.33	423	2304
B256	31.85	1.53	7.78	720.67	860.67	4769
B257	31.98	2.01	7.72	575.33	723.67	3921
Z543	30.73	0.23	11.28	86.67	635.67	2184
Z546	30.22	1.42	10.2	268.33	807	3284
Y566	32.11	1.95	7.72	584	780	4116
Y567	31.65	0.09	7.78	231	682	2764
Y568	31.79	1.25	7.78	595	798.33	4205
Y569	31.8	0.7	7.78	449	891.67	4047
Y570	32.37	2.04	7.64	681.67	721	4225
Y571	31.94	1.86	8.28	264.67	605	2625
Y572	31.37	0.01	10.48	665.33	1003.33	5030
Y573	31.61	0.72	8.28	370.67	647.67	3076
Y574	31.75	1.24	7.78	595	798.33	4205
Y575	31.89	2.09	7.72	721	694	4269
Y576	31.96	1.93	8.28	384.67	606.33	2989
Y577	31.65	0.08	7.78	252.67	658	2757
Y578	32.1	1.94	7.72	576.67	804	4166
Y579	32.64	3.16	8.16	420	644.33	3210
Y580	32.25	2	7.64	728.67	733	4402
Y686	32.29	1.92	7.64	752.67	728.67	4461
Y687	32.25	1.96	7.64	728.67	733	4402
Y688	31.91	1.85	8.28	258.67	604.33	2605
Y689	31.95	1.43	7.78	615	795.33	4256
Y690	32.03	1.52	7.78	650	796.33	4364
Y691	32.11	1.96	7.72	580.33	785.33	4121
Y692	31.93	2.06	7.72	695.67	686.33	4170
Y693	32.14	1.92	7.72	581	816	4215
Y694	31.53	0.76	8.28	392	624.67	3071
Y695	31.84	0.75	7.78	397.67	848	3762
Y696	32.74	3.05	8.12	557.67	667.33	3700
Y697	32.15	1.74	8.34	588	656	3756
Z705	32.58	2.39	8.12	659.67	698.33	4099
Z706	32.49	2.27	8.1	247	699	2854
Z707	32.46	2.13	7.64	713	715.33	4302
Z708	31.67	1.95	8.34	586.67	652	3740
Z710	31.22	1.94	8.34	278	919	3615
Z714	31.24	1.91	8.34	278	919	3615
Z716	31.23	1.95	8.34	323	929.67	3782
Z717	31.24	1.92	8.34	330	917	3765
Z718	31.24	1.92	8.34	330	917	3765
Z720	32.49	2.27	8.1	247	699	2854
Z721	30.03	-0.04	11.76	86.67	690.33	2353
Z722	29.72	0.1	11.78	64.33	438.67	1521
Z723	30.23	0.03	11.78	72.67	422.67	1508
Z726	24.21	0.39	10.4	108.33	518.67	1906
Z727	31.93	-0.06	11.18	113	1179	3893
Z728	30.83	0.47	11.18	105.67	489.33	1807
Z729	30.72	1.51	9.58	285.33	597.67	2691
Z730	31.18	1.41	8.3	209.67	549.67	2298
Z731	30.43	0.96	8.3	205.33	437.67	1971
Z732	30.06	0.93	8.3	155.67	477.67	1943
Z733	30.38	0.24	11.46	74.33	428	1528
Z740	28.16	1.21	10.4	73.33	524.33	1830
Z743	29.24	-0.53	12	68.33	202.67	824
F1230	27.63	1.28	8.3	290	607	2711
F1231	31.7	1.54	8.16	264.33	700.67	2928
Z1480	30.32	1.37	10.2	321	667.67	2988
B1483	32.54	5.45	3.84	893.33	995.33	6374
B1484	32.13	4.95	3.62	1101.33	1077.33	7260
B1487	32.61	3.31	6.3	296.33	461.33	2667
B1488	31.36	2.93	8.36	429	543.67	2955
B1489	31.94	2.96	7.58	354.67	482	2865
B1490	31.52	2.66	7.58	288	484	2662
B1491	32.35	4.29	7.14	456.33	543.33	3097
B1492	32.39	4.4	5.2	593.33	1375.33	6534
B1495	32.16	1.62	8.34	592.67	643.67	3733
B1496	31.85	1.52	7.78	726.33	868	4808
B1497	32.01	2.05	7.72	444.67	798.67	3754
B1498	31.7	2.02	7.72	611	665.67	3854
B1499	31.92	1.57	7.64	780.33	777.33	4690
B1500	32.53	1.83	8.1	377.67	614	2991
B1501	31.99	2.28	8.16	403	755.67	3505
B1502	31.94	1.99	8.1	373	682.33	3194
B1503	32.76	3.58	6.18	336	478.67	2918
B1504	29.6	3.23	8.98	196.67	461	1988
B1505	31.98	2.23	7.64	951.67	710	5009
B1506	32.38	2.34	7.64	734.67	676	4249
B1507	32.05	2.35	8.22	695.33	675.67	4131
B1508	31.52	1.55	8.34	625.33	625.33	3776
B1509	31.41	1.37	8.76	566	645	3657
B1510	32.53	2.87	8.22	512.67	645.67	3493
B1511	32.04	2.78	8.7	346	689.67	3125
B1512	32.13	2.83	8.34	522	665	3579
B1513	32.13	2.65	8.34	763	700.33	4408
B1514	31.89	1.96	8.58	584	634.33	3679
B1515	31.69	1.53	8.76	523	624.67	3467
B1516	31.37	1.53	8.76	427.67	616.33	3142
B1517	31.22	1.52	8.96	361	615	2938
B1518	32.3	2.35	8.34	785.33	656.33	4349
B1519	31.72	1.86	8.34	788	671	4401
B1520	31.77	1.4	8.76	556	649	3639
B1521	32	1.47	8.58	593.67	641	3728
B1522	32.09	1.83	8.34	541.67	642.33	3576
B1523	32.47	2.45	8.22	542.67	633.67	3547
B1524	32.69	3.12	8.12	514.33	677	3599
B1525	32.46	2.94	8.22	463.33	630	3298
B1526	32.39	2.54	8.34	751.67	644.33	4206
B1527	31.99	2.36	8.58	585.67	642.33	3708
B1528	31.71	2.63	8.58	539.33	642.67	3570
B1529	31.71	2.31	8.76	468.67	629.33	3318
B1531	30.29	2.33	8.86	439.33	638.33	3243
B1532	30.29	2.64	8.68	529.67	625.67	3476
B1533	32.29	3.03	8.86	292	505	2409
B1534	31.93	1.42	7.64	712	827.33	4635
B1535	32.06	1.53	7.64	756	802.33	4692
B1536	31.37	1.87	8.34	643.33	643.33	3884
B1537	31.71	2.06	8.34	643	686.33	4012
B1538	31.97	1.66	8.34	622.67	641	3815
B1539	32.13	1.8	8.34	774	648	4290
B1540	32.32	2.29	8.34	785.33	656.33	4349
B1541	32.65	3.1	7.64	478	646	3389
B1542	32.67	3.08	8.16	540	643.67	3568
B1543	32.6	2.84	8.22	577.33	632.67	3648
B1544	32.03	2.05	8.34	545	666.33	3658
B1545	33.31	4.15	4.44	546	488	3775
B1546	32.13	5.02	3.62	1124.67	957.67	6987
B1547	32.31	5.18	3.62	1534.67	954	8195
B1548	32.34	5.32	3.62	848.67	1050.67	6404
B1549	32.86	3.93	6.18	429.33	482	3285
B1550	29.13	2.52	8.84	376.67	469	2734
B1957	30.79	3.24	9.1	280	397.33	2201
B1958	30.17	3.18	9	294	504.33	2412
B1959	30.74	2.99	8.94	297	526.67	2490
B1960	29.47	3.06	8.98	145	423.33	1884
B1961	31.07	2.79	8.58	189.67	393.67	2001
B1962	30.98	2.68	9.1	281	496	2513
B1963	29.19	2.86	9.08	185.67	492	2051
B1964	29.19	2.81	9.08	195	506	2121
B1965	30.75	2.99	8.94	297	528	2494
B1966	30.93	3.01	9	345.33	519.33	2613
B1967	31.16	2.62	8.94	326	554.33	2664
B1968	30.08	2.12	8.1	127.33	669	2412
B1969	30.62	2.08	8.1	132.67	659.33	2401
B1970	30.56	2.11	8.1	130	669.67	2425
B1971	30.48	2.78	9	266.33	498.67	2314
B1972	30.93	3.01	9	318	519.33	2531
B1973	31.19	2.56	8.94	326.67	562.67	2691
B1974	29.66	3.2	8.98	194	450.67	1949
B1975	30.78	3.13	9.1	280	405	2224
B1976	31.18	2.36	7.78	253.67	452.67	2446
B1977	32.53	3.69	6.18	494	484.67	3474
B1978	33.11	4.09	4.44	541	483	3758
B1979	32.97	5.13	4.84	911.67	880	6005
B1980	32.81	5.61	3.84	923	1103.33	6776
B1981	32.35	5.3	3.62	1234.67	953.67	7294
B1982	32.02	5.05	3.62	1220.33	1018.67	7426
B1983	32.33	5.12	3.62	1462.33	955	7988
B1984	32.04	4.91	3.62	1149	1294.33	7495
B1985	32.12	3.13	6.3	415.67	505	3210
B1988	32.66	3.87	5.2	821	1229.33	6209
B1989	31.82	4.4	7.14	461	549	3065
B1990	31.51	4.08	7.28	417.67	548.67	2913
B1991	32.51	4.71	7.14	525.67	643.33	3541
B1992	32.76	4.81	5.8	515.33	770.33	3874
B1993	32.78	4.62	5.8	541.67	711.67	3777
B1994	32.49	4.23	7.14	367.67	568.67	3198
B1995	32.48	4.27	7.14	429.67	585.67	3144
B1996	31.9	4.82	3.62	934.67	1790.33	8300
B1997	31.81	4.82	3.62	819.67	1519	7115
B1998	32.51	4	5.2	852	939.67	5439
B1999	32.71	3.86	5.2	985.33	1194	6592
B2010	32.91	4.4	6.32	541.67	619	3576
B2011	32.74	3.89	7.22	751.67	631.33	4179
B2012	32	3.68	7.22	729.33	670	4216
B2013	31.04	1.4	8.96	299	668	2911
B2014	30.99	1.28	8.96	319.33	640	2888
B2015	29.34	1.68	8.82	236.33	545.33	2356
B2016	30.5	1.92	8.96	262.67	567	2499
B2017	30.57	2.35	8.64	304.67	623.33	2795
B2018	29.48	2.14	8.2	266.33	594	2601
B2019	30.96	2	8.2	272.33	598.33	2623
B2020	30.67	1.92	8.98	302	637	2831
B2021	31.65	3.92	7.22	587.67	761	4076
B2022	31.2	3.51	8.04	574.67	564	3430
B2071	29.8	1.56	9.06	135.33	481.67	2050
B2073	31.66	2.79	7.58	370.33	491.33	2937
B2086	33	3.73	6.18	471.33	485	3413
B2087	33.18	4.26	4.84	772.33	618	4789
B2088	33.02	4.82	3.84	765	941	5809
B2089	33	4.82	3.84	784	839.67	5528
B2090	33.37	4.15	4.84	667	531.33	4214
B2091	32.86	3.97	6.18	417.33	483.67	3297
B2092	32.65	4.04	6.18	324	495.67	2947
B2093	32.92	4.05	6.18	630.33	531	4024
B2094	32.97	4.04	6.32	838.67	492	4532
B2105	31.68	0.76	7.85	726.33	868	4808
B2106	32.47	1.79	8.19	247.67	602.33	2566
B2107	31.99	1.57	8.14	596	654	3774
B2108	31.74	2.11	8.76	465.33	629	3293
B2132	29.64	3.06	8.98	154.33	490	1948
Z2134	31.15	1.42	8.3	259	566.67	2500
B2140	30.38	2.83	9	88	532.67	1881
Z2144	23.22	1.76	9.5	788	641.33	4288
Z2145	23.52	1.48	9.5	788	733	4563
Z2146	23.98	1.04	9.5	1041.67	701.33	5229
Z2147	24.58	0.57	9.5	667.33	634	3904
Z2148	24.93	-0.81	11.5	104.67	314.67	1270
Z2149	23.75	-0.75	11.5	101.67	247.33	1064
B2151	33.04	4.5	4.84	476	623.33	3964
B2152	33.02	4.83	4.84	631.67	832.33	5048
B2153	33.03	4.69	4.84	485.33	731.33	4244
B2154	32.55	5.43	3.84	773.67	1051.33	6202
B2155	32.35	5.31	3.62	1126.67	990.67	7076
B2156	32.33	5.36	3.62	1251.67	926.33	7259
B2157	33.4	4.41	3.84	701.33	760.33	5053
B2163	33.31	4.4	3.84	736	742.67	5117
2187	31.56	2.9	7.46	424.33	494	3106
2188	31.56	2.9	7.46	406.33	490	3041
2189	31.56	2.9	7.39	398.67	493.33	3031
2190	31.95	1.36	8.07	537.67	790.33	4008
2191	31.99	1.51	7.86	642	709.67	4079
2192	31.98	1.47	7.74	531.33	714.67	3762
2193	31.99	1.51	7.86	632.67	696.33	4011
2194	32	1.53	7.83	706	681.67	4187
2195	31.98	1.47	7.74	655	686.33	4048
2196	32	1.51	7.74	657.33	688	4060
2197	31.28	2.66	8.63	506	584	3280
2198	31.81	2.93	8.24	437.33	631.33	3225
2199	31.99	2.55	8.16	538	675.33	3658
2200	31.99	2.5	8.16	536	678	3660
2201	32.16	1.71	8.1	410.67	730	3451
2202	30.51	2.37	9.26	119.33	627.33	2263
2203	30.51	2.37	9.26	119.33	627.33	2263
2204	30.73	2.64	9.26	119.33	598	2175
2205	30.73	2.64	9.24	117.67	418.33	1625
2206	30.73	2.64	9.24	117.67	627.33	2252
2207	29.11	1.78	9.15	117.67	677.67	2403
2208	29.01	1.88	9.04	109	559.67	2016
2209	29.16	2.22	9.04	109	519.33	1895
2210	29.19	2.25	9.04	109	541.33	1961
H130	30.37	3.88	7.36	295.67	636.33	3046
H131	30.37	3.88	7.36	295.67	636.33	3046
H132	30.43	4.55	7.2	291	622.33	2980
H133	29.77	6.28	7.32	282.33	690.33	3205
H134	28.77	6.33	7.32	255.33	595	2826
H135	30.22	6.01	6.78	401	575.33	3196
H136	28.69	6.91	7.08	369	846.67	4013
H137	28.92	7.16	7.42	212.67	474.33	2275
H138	28.14	6.82	7.56	198	516	2374
H139	29.12	7.13	7.38	261.67	525.33	2591
H140	28.76	7.4	7.2	283.33	573.33	2942
H141	20.59	8.06	6.14	1175.33	3914	17385
H142	21.09	8.02	6.14	908.33	2589	12207
H143	24.35	6.53	6.8	663.67	1841.67	8969
H144	25.57	5.2	7.1	531.67	1369.33	6680
H145	28.88	5.58	7.46	312.67	517.67	3027
H146	25.65	6.72	6.2	1142.67	2849	13850
H147	25.63	6.64	6.2	1152.67	2849	13880
H148	25.75	6.74	6.2	1142.67	2849	13850
H1109	27.42	8.7	6.82	583	1131	5598
H1110	28.61	6.56	7.08	326.33	858	3923
H1111	29.39	6.63	7.56	260.33	564.67	2719
H1112	28.12	6.14	7.48	238.67	542.67	2589
H1113	28.12	6.14	7.48	238.67	542.67	2589
H1114	29.13	5.57	7.32	396	530.67	3019
H1115	29.66	6.12	7.36	252.33	570.67	2748
H1116	29.44	0.74	8.84	220.67	441.67	2184
H1117	29.7	2.68	7.06	420.33	900	4300
H1118	32.3	1.45	7.06	377.33	572.67	3052
H1119	29.54	3	7.06	458.67	932.33	4522
H1120	30.56	1.73	8.32	318.33	501.67	2657
H1325	27.56	8.84	6.82	583	1131	5598
H1326	28.72	5.27	7.08	355.33	869.67	4040
H1328	27.66	5.84	7.48	250.33	522.33	2553
H1329	29.81	6.77	7.36	252.33	570.67	2748
H1330	29.67	0.72	8.84	220.67	441.67	2184
H1331	31.17	2.99	6.94	364.33	678.33	3442
H1332	30.44	1.26	8.32	287	494.67	2523
H1333	30.12	3.46	7.68	344	677	3425
H1334	27.57	8.91	6.82	494	1054.67	5064
H1335	24.3	6.89	6.14	631.33	2095	8965
H1336	25.56	6.51	6.2	1152.67	2849	13880
H1337	27.26	8.01	6.14	921.67	2997	13694
H1338	24.04	7.46	6.76	648.67	1661	8161
H1339	24.77	5.45	6.8	563.33	1544	7309
H1340	26.45	6.68	6.84	474	1206.33	5679
H1341	27.57	4.33	7.42	345	498.67	3043
H1342	24.89	4.09	7.36	438.67	951.67	4690
H1343	28.3	4.76	7.36	242	707.67	3144
H1344	29.87	5.64	7.32	254.33	520	2568
H1345	28.17	5.73	7.56	275	593.67	2845
H1370	25.66	2.73	7.44	289.33	760	3708
H1371	17.51	8.32	6.14	1659.67	4809	21897
D2044	30.59	2.9	6.88	286	775	3511
D2045	30.82	2.74	6.92	422	702	3705
G037	29.9	10.42	3.39	2199.33	2837.33	17652
G038	29.82	10.5	3.39	2199.33	2837.33	17652
G039	29.9	10.38	3.39	2199.33	2837.33	17652
G040	30.22	12.45	3.21	3626.33	6021.33	33047
G041	30.28	12.45	3.21	3355.33	4737.67	28040
G043	30.3	12.45	3.46	3355.33	4737.67	28040
G044	30.29	12.49	3.28	2321.33	3034.33	19350
G045	30.31	12.42	3.28	3355.33	4737.67	28040
G046	30.32	12.46	3.28	2393.67	3314	20387
G047	30.36	12.5	3.36	1771	2520	15635
G048	30.41	12.37	3.46	1378.67	1957	12435
G050	30.43	12.16	3.49	2000.33	2934	17734
G061	30.68	12.48	3.03	739	1367	8086
L087	33.58	5.56	0.38	810.33	806	5403
L088	33.68	6.24	2.72	500.67	623.67	3961
L089	33.07	4.96	2.14	525.67	678.67	4151
L093	34.31	6.76	0.4	641.33	846	5043
L094	34.36	7.38	0.4	649.33	856.67	5077
L152	34.31	6.74	0.4	641.33	844	5046
S158	32.38	4.27	4.22	402.33	593.67	3818
S159	30.46	5.16	4.22	722.67	629.33	5007
S160	31.41	4.85	4.1	552.67	622.67	4410
L162	32.9	5.96	0.18	605.33	826.67	5224
L163	33.75	7.14	0.18	700.67	908	5694
L164	32.97	6.13	0.18	643.67	846.67	5371
Z735	32.08	1.41	6.66	334.33	743.67	3587
G1347	29.28	12.38	3.15	3120	3412.67	22661
G1348	29.28	12.38	3.15	3120	3412.67	22661
G1349	29.28	12.38	3.15	3120	3412.67	22661
G1350	29.26	12.4	3.15	3120	3412.67	22661
G1351	29.39	12.46	3.15	2916.67	3242.67	21506
G1352	29.59	10.62	3.31	2266.67	2831	18010
B1482	31.34	4.29	0.26	599.33	920.67	5133
B1485	32.91	4.28	0.5	709	891.67	5367
B1486	32.01	3.97	0.4	629	925.67	5312
B1493	34.16	7.31	0.72	623.67	698	4497
L1708	31.65	3.31	6.36	313.67	828.67	3907
L1709	31.49	3.79	6.36	311.67	809.33	3857
L1710	26.4	5.94	6.36	371	797.33	4006
L1711	27.55	5.19	6.28	541	827.67	4599
L1712	28.83	4.74	6.28	633.33	795.33	5019
L1713	31.97	3.03	6.28	428.67	703	3854
L1714	28.1	5.88	6.28	417	675	3694
L1715	29.89	5.73	5.9	417	675	3694
L1716	29.89	5.67	5.9	417	675	3694
L1717	30.16	5.59	5.9	417	675	3694
L1718	28.6	5.04	5.7	354	684.33	3732
L1719	28.85	5.14	5.7	354	684.33	3732
L1720	29.09	5.13	5.7	375	732.67	3939
B1986	32.52	3.26	3.94	533	621.67	3948
B1987	32.66	3.38	3.94	488	605.67	3788
L2000	33.42	5.18	3.08	463.67	615	3815
L2001	33.3	5.1	3.08	487	650	3986
L2002	32.13	3.58	0.26	615.67	794.33	4843
L2003	32.19	3.42	0.26	758.67	672.33	4925
L2004	32.06	3.44	0.26	682.33	705	4811
L2005	32.66	3.79	0.5	666.67	810.67	5074
L2006	32.86	4.09	1.98	618.67	701.67	4495
L2008	32	4.01	0.4	674.33	887	5362
L2009	32.22	3.82	0.4	678.33	887.33	5403
L2023	32.19	3.66	0.4	646.67	819	4994
L2024	31.67	3.44	0.26	735	674.67	4855
L2025	33.72	4.73	0.38	972.33	844.67	6025
D2026	31.26	2.16	6.84	411.67	757	3889
D2027	31.97	1.24	6.66	349.33	713.67	3639
B2028	34.31	6.75	0.4	641.33	846	5043
B2029	31.59	3.91	6.28	1104.33	572.67	5610
B2030	31.94	4.18	5.9	562.33	579.33	4147
B2031	31.5	4.51	5.94	515	570.67	3953
S2032	30.65	4.98	4.1	726	682	5135
S2033	30.78	5.05	4.1	596.33	721.33	4855
L2034	33.31	7.36	0	749.67	919.33	5964
G2041	29.35	13.24	0	3120	3412.67	22661
G2042	30.74	12.36	0.3	752.67	1348.67	7840
G2043	27.95	5.13	6.28	541	827.67	4599
D2046	32.22	1.44	6.66	368.33	730.67	3581
L2047	31.05	3.65	6.36	311.67	809.33	3857
L2069	31.99	2.96	4.44	364	517.33	3138
L2070	32.75	5.14	4.44	469.33	691.33	3980
L2072	32.39	3.99	0.38	975.67	833.67	6043
L2073	32.93	5.91	0.04	786.33	874	6052
L2075	32.92	4.33	3.32	555.67	598.33	4004
L2077	32.27	3.69	0.4	657.33	783.67	4898
L2078	31.91	3.61	0.26	630	825.67	4964
L2079	31.97	3.52	0.26	824	659.33	5062
L2080	31.62	3.16	0.26	683	688.67	4740
L2081	31.64	3.02	0.28	616.33	696.33	4612
L2082	31.94	4.08	0.58	707	898	5459
L2083	32.89	4.43	0.58	658.67	875	5233
B2084	32.73	3.78	3.94	516.33	685.67	4086
B2085	33.21	4.06	2.92	738	859.33	5401
L2109	33.4	5.96	2.72	473.33	628	3858
L2110	33.48	5.97	2.72	459	632	3825
L2111	33.48	5.97	2.72	459	632	3825
L2115	34.43	7.88	0	750.67	896	5582
L2117	33.66	7.54	0	850.67	1019.67	6677
L2118	32.55	5.44	1.08	659.67	632	4954
L2119	33.86	6.67	0.78	656.67	676.33	4505
L2128	31.23	3.63	6.36	313.67	828.67	3907
L2142	34.43	7.88	0	750.67	896	5582
B2158	32.07	3.17	0.28	755	641.67	4890
B2161	33.18	4.09	2.92	698.67	994.33	5707
L2164	31.68	2.92	0.28	721	667	4835
L090	34.65	6.09	1.58	747.33	651	4813
L091	34.71	7.25	0.08	712.67	659.33	4688
L092	34.66	7.24	0.02	723.67	774.33	5005
A099	34.64	7.48	0.02	670	676.67	4529
A100	34.37	6.89	0.08	875.33	667.67	5196
A103	34.62	8.63	0.02	736.33	783.67	5220
A104	34.68	8.51	0.02	778	840	5520
A105	33.49	5.58	3.12	586.33	762.33	4646
A106	34.5	8.93	0.38	905	967	6272
A107	34.88	9.4	0	762	1047	6093
A108	34.97	9.7	0	780	1103.33	6287
A127	34.63	11.61	0	918	1215	7786
L151	34.64	10.85	0	924.67	1073.67	7026
L153	34.7	7.1	0.04	839	765.67	5387
A168	34.7	8.74	0	644	740.67	4778
A171	34.98	10.36	0	845.67	1025.33	6249
A174	34.89	11.67	0	846	1070.33	6739
A175	34.69	12.57	0	837.33	1189.33	7395
L178	33.65	12.45	0	1117.33	1023.33	7951
A533	31.88	3.23	8.32	598	583	3963
A534	31.26	2.55	6.32	591.67	529.67	3748
C1955	33.65	12.45	0	1117.33	1023.33	7951
L2076	31.39	3.22	0.3	821.67	591.67	4899
L2116	34.31	9.89	0	801	990.33	6301
L2150	31.83	3.21	0.3	893.33	576.67	5054
L2160	33.96	3.87	1.58	680.33	562.67	4331
A2165	34.88	8.84	0.02	732	775	5193
L2166	34.43	8.04	0.03	660.33	758.67	4951
L2167	34.43	8.04	0.05	656	720.33	4630
L2168	34.31	7.32	0.6	684.67	654.33	4562

## Sheet: taxa
Obsname	Atax	Btep	Iacu	Ipal	Ipar	Ipat	Isph	Nlab	Ocen	Pret	Selo	Sram	Slaz	Smir	Sspp	Pdal	Stri	Imin	Ekar	Bspp	Dubr	Peri	Lspp	Snep	Xxan	Squa	Tapp	Vcal	Vspi	Qcon	Pkof	Parc	Espp
B080	0	0	0	1.01	0	0	0	1.01	72.64	0	24.66	0	0	0	0	0	0	0	0	0	0	0	0	0	0	0	0	0	0	0	0.68	0	0
B081	0	0	0	0	0	0	0	0.219978	78.5721	0	20.8779	0.109989	0	0	0	0	0	0	0	0.219978	0	0	0	0	0	0	0	0	0	0	0	0	0
B082	0	0	0	0	0	0	0	0	87.05	0	11.45	0	0	0	0	0	0	0.9	0	0.6	0	0	0	0	0	0	0	0	0	0	0	0	0
B256	0	0	0	1.45985	0	0	0	0	3.39966	0	1.93981	0	0	0	0	0.489951	0	25.7274	0	66.9833	0	0	0	0	0	0	0	0	0	0	0	0	0
B257	0	0	0	3.5	0	0	0	0	25	0	5	0	0	0	0	3.5	0	29	0	34	0	0	0	0	0	0	0	0	0	0	0	0	0
Z543	0	0	0	0	0	0	0	0	0.410041	0	0	0	0	0	0	0	0	60.5861	0	38.1738	0	0	0	0	0	0	0	0	0	0	0	0.830083	0
Z546	0	0	0	0	0	0	0	0	0.28	0	0	0	0	0	0	0	0	55.09	0	42.15	0	0	0	0	0	0	0	0	0	0	0	2.48	0
Y566	0	0	0	0	0	0	0	0	1.79982	0	0	0	0	0	0	0	0	76.6423	0	21.5578	0	0	0	0	0	0	0	0	0	0	0	0	0
Y567	0	0	0	0.54	0	0	0	0	0	0	0	0	0	0	0	0	0	78.49	0	20.97	0	0	0	0	0	0	0	0	0	0	0	0	0
Y568	0	0	0	0	0	0	0	0	1.30013	0	0	0	0	0	0	0	0	72.7273	0	25.9726	0	0	0	0	0	0	0	0	0	0	0	0	0
Y569	0	0	0	0	0	0	0	0	0	0	0	0	0	0	0	0	0	76.2776	0	23.1623	0	0	0	0	0	0	0	0	0	0	0	0.560056	0
Y570	0	0	0	0	0	0	0	0	2.63	0	0.66	0	0	0	0	0	0	71.71	0	25	0	0	0	0	0	0	0	0	0	0	0	0	0
Y571	0	0	0	0	0	0	0	0	0.610061	0	0	0	0	0	0	0.610061	0	76.6877	0	22.0922	0	0	0	0	0	0	0	0	0	0	0	0	0
Y572	0	0	0	0	0	0	0	0	0	0	0	0	0	0	0	0	0	83.33	0	16.67	0	0	0	0	0	0	0	0	0	0	0	0	0
Y573	0	0	0	0	0	0	0	0	0.629937	0	0	0	0	0	0	0	0	62.2638	0	35.8464	0	0	0	0	0	0	0	0	0	0	0	1.25987	0
Y574	0	0	0	0	0	0	0	0	0	0	0	0	0	0	0	0	0	80.73	0	18.67	0	0	0	0	0	0	0	0	0	0	0	0.6	0
Y575	0	0	0	0	0	0	0	0	2.58	0	1.29	0	0	0	0	0	0	84.52	0	11.61	0	0	0	0	0	0	0	0	0	0	0	0	0
Y576	0	0	0	0	0	0	0	0	1.25	0	0	0	0	0	0	0	0	80	0	18.75	0	0	0	0	0	0	0	0	0	0	0	0	0
Y577	0	0	0	0	0	0	0	0	1.84018	0	0	0	0	0	0	0	0	71.7772	0	26.3826	0	0	0	0	0	0	0	0	0	0	0	0	0
Y578	0	0	0	0	0	0	0	0	2.58	0	0.65	0	0	0	0	0	0	85.16	0	11.61	0	0	0	0	0	0	0	0	0	0	0	0	0
Y579	0	0	0	0	0	0	0	0	25.3325	0	7.33073	0	0	0	0	2.0002	0	56.0056	0	9.33093	0	0	0	0	0	0	0	0	0	0	0	0	0
Y580	0	0	0	0.60006	0	0	0	0	0.60006	0	0.60006	0	0	0	0	0	0	85.5486	0	12.6513	0	0	0	0	0	0	0	0	0	0	0	0	0
Y686	0	0	0	0	0	0	0	0	4.54955	0	0.649935	0	0	0	0	0	0	82.4618	0	12.3388	0	0	0	0	0	0	0	0	0	0	0	0	0
Y687	0	0	0	0	0	0	0	0	2.56	0	0	0	0	0	0.64	0	0	72.44	0	24.36	0	0	0	0	0	0	0	0	0	0	0	0	0
Y688	0	0	0	0	0	0	0	0	1.84	0	0	0	0	0	1.23	0	0	66.26	0	30.06	0	0	0	0	0	0	0	0	0	0	0	0.61	0
Y689	0	0	0	0	0	0	0	0	0	0	0	0	0	0	0	0	0	74.56	0	25.44	0	0	0	0	0	0	0	0	0	0	0	0	0
Y690	0	0	0	0.670067	0	0	0	0	0.670067	0	0	0	0	0	0	0.670067	0	67.7868	0	30.203	0	0	0	0	0	0	0	0	0	0	0	0	0
Y691	0	0	0	0	0	0	0	0	5.52055	0	0.610061	0	0	0	0	1.23012	0	64.4164	0	28.2228	0	0	0	0	0	0	0	0	0	0	0	0	0
Y692	0	0	0	0.669933	0	0	0	0	2.66973	0	1.32987	0	0	0	0	0	0	74.6625	0	20.6679	0	0	0	0	0	0	0	0	0	0	0	0	0
Y693	0	0	0	0.65	0	0	0	0	2.6	0	0	0	0	0	1.95	0	0	59.09	0	35.06	0	0	0	0	0	0	0	0	0	0	0	0.65	0
Y694	0	0	0	0	0	0	0	0	0	0	0.65	0	0	0	0	0	0	47.06	0	52.29	0	0	0	0	0	0	0	0	0	0	0	0	0
Y695	0	0	0	0	0	0	0	0	0.570057	0	0	0	0	0	0	0	0	67.2467	0	32.1832	0	0	0	0	0	0	0	0	0	0	0	0	0
Y696	0	0	0	0	0	0	0	0	19.998	0	6.66933	0	0	0	0	0	0	54.6645	0	18.6681	0	0	0	0	0	0	0	0	0	0	0	0	0
Y697	0	0	0	0.630063	0	0	0	0.630063	67.3067	0	6.0306	0.950095	0	0	1.27013	0.320032	0	16.5117	0	6.0306	0	0	0	0	0	0	0	0	0	0	0	0.320032	0
Z705	0	0	0	0	0	0	0	0	0	0	0	0	0	0	0	0	0	45.16	0	54.84	0	0	0	0	0	0	0	0	0	0	0	0	0
Z706	0	0	0	0	0	0	0	0	0	0	0	0	0	0	0	0	0	60.47	0	39.53	0	0	0	0	0	0	0	0	0	0	0	0	0
Z707	0	0	0	0	0	0	0	0	1.16	0	0	0	0	0	0	0	0	66.86	0	31.98	0	0	0	0	0	0	0	0	0	0	0	0	0
Z708	0	0	0	0	0	0	0	0	0	0	0	0	0	0	0	0	0	67.09	0	32.91	0	0	0	0	0	0	0	0	0	0	0	0	0
Z710	0	0	0	0	0	0	0	0	3.7	0	0	0	0	0	0	0	0	48.15	0.93	44.44	0	0	0	0	0	0	0	0	0	0	0.93	1.85	0
Z714	0	0	0	0	0	0	0	0	1	0	1	0	0	0	1	0	0	55	1	40	0	0	0	0	0	0	0	0	0	0	1	0	0
Z716	0	0	0	0	0	0	0	0	0	0	0	0	0	0	0	0	0	40.86	0	56.99	0	0	0	0	0	0	0	0	0	0	0	2.15	0
Z717	0	0	0	0	0	0	0	0	0	0	0	0	0	0	0	0	0	34.87	0	63.16	0	0	0	0	0	0	0	0	0	0	0	1.97	0
Z718	0	0	0	0.729927	0	0	0	0	0	0	0	0	0	0	0	0	0	48.9051	0	46.7153	0	0	0	0	0	0	0	0	0	0	0	3.64964	0
Z720	0	0	0	0	0	0	0	0	0	0	0	0	0	0	0	0	0	65	0	34	0	0	0	0	0	1	0	0	0	0	0	0	0
Z721	0	0	0	0	0	0	0	0	0	0	0	0	0	0	0	0	0	25.8026	0	70.5671	0	0	0	0	0	0	0	0	0	0	0	3.63036	0
Z722	0	0	0	0	0	0	0	0	0	0	0	0	0	0	0	0	0	38.71	0	50.97	0	0	0	0	0	0	0	0	0	0	0	10.32	0
Z723	0	0	0	0	0	0	0	0	0	0	0	0	0	0	0	0	0	36.8	0	60.42	0	0	0	0	0	0	0	0	0	0	0	2.78	0
Z726	0	0	0	0	0	0	0	0	1.64	0	0	0	0	0	0	0	0	50.82	0	37.7	0	0	0	0	0	0	0	0	0	0	0	9.84	0
Z727	0	0	0	0	0	0	0	0	0	0	0	0	0	0	0	0	0	21.8178	0	71.5128	0	0	0	0	0	0	0	0	0	0	0	6.66933	0
Z728	0	0	0	0	0	0	0	0	0	0	0	0	0	0	0	0	0	17.9882	0	77.6922	0	0	0	0	0	0	0	0	0	0	0	4.31957	0
Z729	0	0	0	0	0	0	0	0	0	0	0	0	0	0	0	0	0	42.72	0	43.69	0	0	0	0	0	0.97	0	0	0	0	0	12.62	0
Z730	0	0	0	0	0	0	0	0	2.69973	0	0.679932	0	0	0	0	0	0	42.5657	0	50.6749	0	0	0	0.339966	0	0	0	0	0	0	0	3.0397	0
Z731	0	0	0	0	0	0	0	0	0	0	0	0	0	0	0	0	0	14.29	0	76.62	0	0	0	0	0	0	0	0	0	0	0	9.09	0
Z732	0	0	0	0	0	0	0	0	1.83	0	0	0	0	0	0	0.46	0	22.02	0	66.97	0	0	0	0	0	0.92	0	0	0	0	1.38	6.42	0
Z733	0	0	0	0	0	0	0	0	2.22	0	0	0	0	0	0	0	0	47.78	1.11	41.11	0	0	0	0	0	0	0	0	0	0	1.11	6.67	0
Z740	0	0	0	0.509949	0	0	0	0	0	1.0199	0	0	0	0	0	0	0	21.8278	0	54.3046	0	0	0	0	0	0.509949	0	0.509949	0	0	8.62914	12.6887	0
Z743	0	0	0	0.51	0	0	0	0	2.04	0	0	0	0	0	0	0	0	17.86	0	69.9	0	1.53	0	0	0	0	0	0	0	0	0	8.16	0
F1230	0	0	0	0	0	0	0	0	0.63	0	0	0	0	0	0	0.32	0	96.83	0	2.22	0	0	0	0	0	0	0	0	0	0	0	0	0
F1231	0	0	0	0	0	0	0	0	3.88039	0	0	0	0	0	0	6.15062	0	75.4075	0	14.5615	0	0	0	0	0	0	0	0	0	0	0	0	0
Z1480	0	0	0	0	0	0	0	0	0	0	0	0	0	0	0	0	0	69.65	0	28.21	0	0	0	0	0	0	0	0	0	0	0	2.14	0
B1483	0	0	0	0	0	0	0	0.679932	22.0278	0	4.74953	0	0	0	0.339966	13.8986	0	41.3559	0	16.9483	0	0	0	0	0	0	0	0	0	0	0	0	0
B1484	0	0	0	0	0	0	0	0.309969	17.8982	0	6.78932	0.929907	0	0.309969	0.619938	3.69963	0	54.9345	0	14.1986	0	0	0	0	0	0.309969	0	0	0	0	0	0	0
B1487	0	0	0	0.280028	0	0	0	7.56076	19.612	0	4.76048	1.9602	0	0	0	11.2011	0	50.145	0	4.20042	0	0	0	0	0	0.280028	0	0	0	0	0	0	0
B1488	0	0	0.690138	0.690138	0	0	0	39.5879	9.03181	0	0.690138	0.690138	0	0	2.08042	46.5393	0	0	0	0	0	0	0	0	0	0	0	0	0	0	0	0	0
B1489	0	0.90009	0	0.90009	0	1.35014	0	42.3442	18.0218	0	2.25023	0.90009	0	0	0.90009	31.0831	0	0	0	1.35014	0	0	0	0	0	0	0	0	0	0	0	0	0
B1490	0	0	0	0.57	0	1.14	0.57	35.8	14.77	0	3.98	1.7	0	0	1.7	39.77	0	0	0	0	0	0	0	0	0	0	0	0	0	0	0	0	0
B1491	0	0.289971	0	0.569943	0	0	0.859914	42.9757	39.536	0	0.859914	4.0096	0	0	0	4.0096	0	2.57974	0	3.72963	0	0.289971	0	0	0	0.289971	0	0	0	0	0	0	0
B1492	0	0	0	0.990099	0	0	0	0	27.7228	0	0.990099	0	0	0	0	8.91089	0	39.604	0	21.7822	0	0	0	0	0	0	0	0	0	0	0	0	0
B1495	0	0	0	0.940094	0	0	0	1.57016	74.2974	0	9.40094	0.940094	0	0	0	3.76038	0	5.0105	0	4.08041	0	0	0	0	0	0	0	0	0	0	0	0	0
B1496	0	0	0	0	0	0	0	0	1.65	0	0	0	0	0	0	0.33	0	73.93	0	24.09	0	0	0	0	0	0	0	0	0	0	0	0	0
B1497	0	0	0	0	0	0	0	0	8.4783	0	0.44991	0.44991	0	0	0.44991	2.67946	0	65.167	0	21.8756	0	0	0	0	0	0	0	0	0	0	0	0.44991	0
B1498	0	0	0	4.18042	0	0	0	4.18042	13.1813	0	1.93019	0.640064	0	0	2.57026	0	0	72.3572	0	0.960096	0	0	0	0	0	0	0	0	0	0	0	0	0
B1499	0	0	0	0	0	0	0	0	2.26023	0	0	0	0	0	0	0	0	61.1361	0	36.6037	0	0	0	0	0	0	0	0	0	0	0	0	0
B1500	0	0	0	0.720144	0	0	0	0	2.17043	0	0.720144	0	0	0	0	0	0	52.9006	0	43.4887	0	0	0	0	0	0	0	0	0	0	0	0	0
B1501	0	0	0	1.09989	0	0	0	0	4.39956	0	0	0	0	0	0	0	0	38.4562	0	53.8446	0	0	0	2.19978	0	0	0	0	0	0	0	0	0
B1502	0	0	0	0	0	0	0	0	9.59	0	1.37	0	0	0	0	5.48	0	63.01	0	20.55	0	0	0	0	0	0	0	0	0	0	0	0	0
B1503	0	0	0	0.72	0	0	0	8.37	21.29	0	6.22	0.24	0	0	0.24	9.81	0	46.41	0	6.7	0	0	0	0	0	0	0	0	0	0	0	0	0
B1504	0	0	0	5.47055	0	0	0	6.25063	72.1472	0	8.07081	2.08021	0	0	2.86029	0.520052	0	1.82018	0	0	0	0	0	0	0	0	0	0	0	0	0	0.780078	0
B1505	0	0	0	0	0	0	0	0	2.29	0	0.65	0	0	0	0	0.65	0	79.09	0	14.06	0	2.61	0	0	0	0	0	0	0	0	0	0	0.65
B1506	0	0	0	0	0	0	0	0	2.13	0	0	0	0	0	0	0	0	75.61	0	22.26	0	0	0	0	0	0	0	0	0	0	0	0	0
B1507	0	0	0	0	0	0.28	0	0	3.41	0	1.14	0	0	0	0	0	0	78.13	0	15.34	0	1.42	0	0	0	0.28	0	0	0	0	0	0	0
B1508	0	0	0	0.56	0	0	0	0.56	56.82	0	5.01	0.56	0	0	0.84	0	0	24.51	0	10.86	0	0	0	0	0	0	0	0	0	0	0.28	0	0
B1509	0	0	0	0.329967	0	0	0	0	60.124	0	6.53935	0.979902	0	0	1.9598	0.329967	0	15.3585	0	14.0486	0	0	0	0	0	0	0	0	0	0	0.329967	0	0
B1510	0	0	0	0.560056	0	0	0	0	32.1132	0	4.79048	0	0	0	0	0.280028	0	48.4548	0	12.6813	0	0.560056	0	0	0	0	0	0	0	0	0	0.280028	0.280028
B1511	0	0	0	0.55	0	0	0	0	1.84	0	0.37	0	0	0	0	0	0	89.34	0	7.72	0	0	0	0	0	0	0	0	0	0	0.18	0	0
B1512	0	0	0	0.910091	0	0	0	0	35.6536	0	5.44054	0.30003	0	0	0.30003	1.81018	0	46.8247	0	7.85079	0	0	0	0	0	0	0	0	0	0	0.910091	0	0
B1513	0	0	0	0.79984	0	0	0	0.269946	29.2541	0	1.59968	0	0	0	0	1.32973	0	60.088	0	5.84883	0	0.269946	0	0	0	0	0	0	0	0.269946	0	0.269946	0
B1514	0	0	0	1.93	0	0	0	1.66	88.67	0	6.35	0	0	0	0.28	0.55	0	0.56	0	0	0	0	0	0	0	0	0	0	0	0	0	0	0
B1515	0	0	0	1.42014	0	0	0	1.06011	80.5081	0.350035	7.80078	2.48025	0	0	1.42014	0.710071	0	2.84028	0	1.06011	0	0.350035	0	0	0	0	0	0	0	0	0	0	0
B1516	0	0	0	1.71983	0	0	0	0	43.8356	0	7.73923	0.569943	0	0	1.14989	0	0	25.7874	0	18.6181	0	0	0	0	0	0	0	0	0	0	0.289971	0.289971	0
B1517	0	0	0	1.17	0	0	0	0.39	25	0	4.69	0.39	0	0	0	6.64	0	47.66	0	13.67	0	0	0	0	0	0	0	0	0	0	0	0.39	0
B1518	0	0	0	0	0	0	0	0.290058	40.6481	0	1.75035	0	0	0	0	1.75035	0	50.8802	0	4.68094	0	0	0	0	0	0	0	0	0	0	0	0	0
B1519	0	0.28	0	0	0	0	0	0	0.84	0	0.28	0	0	0	0	0	0	72.83	0	25.21	0	0.56	0	0	0	0	0	0	0	0	0	0	0
B1520	0	0	0	0.180018	0	0	0	0.530053	84.7885	0	8.14081	0	0	0	0.350035	0.350035	0	4.78048	0	0.880088	0	0	0	0	0	0	0	0	0	0	0	0	0
B1521	0	0	0	0.169983	0	0	0	0.669933	88.4112	0	9.05909	0	0	0	0.169983	0	0	1.17988	0	0.339966	0	0	0	0	0	0	0	0	0	0	0	0	0
B1522	0	0	0.22	0	0	0	0	0	93.49	0	2.82	0	0	0	0.22	0.87	0	1.52	0	0.43	0	0	0	0	0	0	0	0	0	0	0.43	0	0
B1523	0	0	0	0.29	0	0	0	0.87	73.33	0	4.64	0	0	0	0	0.58	0	15.94	0	2.9	0	0	0	0	0	0	0	0	0	0	0	1.45	0
B1524	0	0	0	0.67	0	0	0	0	55.22	0	10.44	0	0	0	0	0.34	0	23.9	0	9.09	0	0	0	0	0	0	0	0	0	0	0.34	0	0
B1525	0	0	0	0.269973	0	0	0	0	48.1252	0	4.54955	0.529947	0	0	0.529947	0.269973	0	34.2266	0	10.429	0	0.269973	0	0	0	0	0	0	0	0	0	0.79992	0
B1526	0	0	0	0.529947	0	0	0	0.269973	67.8932	0	8.21918	0	0	0	0	1.32987	0	19.628	0	1.85981	0	0	0	0.269973	0	0	0	0	0	0	0	0	0
B1527	0	0	0	0.97	0	0.32	0	0	79.29	0	10.03	0	0	0	0	0	0	5.18	0	4.21	0	0	0	0	0	0	0	0	0	0	0	0	0
B1528	0	0	0	1.87037	0	0	0	10.2821	75.245	0	6.54131	0.930186	0	0	0.930186	3.27065	0	0	0	0.930186	0	0	0	0	0	0	0	0	0	0	0	0	0
B1529	0	0	0	0.980098	0	0	0	7.84078	79.4179	0	4.90049	0	0	0	0	6.86069	0	0	0	0	0	0	0	0	0	0	0	0	0	0	0	0	0
B1531	0	0	0	0	0	0	0	3.77	71.23	0	10.38	0.94	0	0	0	13.21	0	0.47	0	0	0	0	0	0	0	0	0	0	0	0	0	0	0
B1532	0	0.67	0	1.33	0	0	0	2	81.33	0	14	0	0	0	0	0	0	0	0	0.67	0	0	0	0	0	0	0	0	0	0	0	0	0
B1533	0	0	0	0.959904	0	0	0	0.959904	66.9833	0	27.2673	0	0	0	0.959904	1.90981	0	0.479952	0	0	0	0	0	0	0	0	0	0	0	0	0	0.479952	0
B1534	0	0	0	0	0	0	0	0	2.77944	0	0.929814	0	0	0	0	0.929814	0	85.173	0	10.188	0	0	0	0	0	0	0	0	0	0	0	0	0
B1535	0	0	0	0	0	0	0	0	4.94049	0	0	0	0	0	0	1.45015	0	80.8181	0	11.9212	0	0.580058	0	0	0	0	0	0	0	0	0	0.290029	0
B1536	0	0	0	0	0	0	0	0	0.940094	0	0	0	0	0	0	0.470047	0	92.9293	0	5.66057	0	0	0	0	0	0	0	0	0	0	0	0	0
B1537	0	0	0	0	0	0	0	0	0.580058	0	0	0	0	0	0	0	0	82.2182	0	16.9117	0	0	0	0	0	0	0	0	0	0	0	0.290029	0
B1538	0	0	0	0.309938	0	0	0	0.309938	16.9166	0	0.309938	0	0	0	0.309938	0.309938	0	64.917	0	12.6175	0	0	0	0	0	0	0	0	0	0	0.309938	3.68926	0
B1539	0	0	0	0	0	0	0	0.290058	42.0684	0	3.53071	0	0	0	0.290058	1.76035	0	45.2991	0	5.59112	0	0.290058	0	0	0	0	0	0	0	0	0	0.880176	0
B1540	0	0	0	0	0	0	0	0	60.53	0	3.68	0	0	0	0.79	0.79	0	26.84	0	5.26	0	0	0	0	0	0	0	0	0	0	0	2.11	0
B1541	0	0	0	0	0	0	0	0	14.5785	0	1.27987	0	0	0	0.509949	0.259974	0	67.5132	0	14.3186	0	0.509949	0	0	0	0	0	0	0	0	0.259974	0.769923	0
B1542	0	0	0	0	0	0	0	0	27.3027	0	5.08051	0	0	0	0	5.08051	0	52.7053	0	7.30073	0	0.630063	0	0	0	0	0	0	0	0	0	1.90019	0
B1543	0	0	0	0.73	0	0	0	0	78.88	0	9.22	0.49	0	0	0.97	0.49	0	7.52	0	1.46	0	0	0	0	0	0	0	0	0	0	0	0.24	0
B1544	0	0	0	0	0	0	0	0	7.72845	0	1.54969	0.259948	0	0	0.519896	0	0	70.8658	0	17.2665	0	0.259948	0	0	0	0.259948	0	0	0	0	0	1.28974	0
B1545	0	0	0	0.290058	0	0	0	2.06041	9.44189	0	3.24065	0	0	0	0	2.36047	0	72.2845	0	10.3221	0	0	0	0	0	0	0	0	0	0	0	0	0
B1546	0	0	0	0.3	0	0	0	1.51	27.41	0	7.53	2.71	0	0	0	19.58	0	27.71	0	13.25	0	0	0	0	0	0	0	0	0	0	0	0	0
B1547	0	0	0	0.280028	0	0	0	0.840084	35.3935	0	9.27093	2.25023	0	0	0.840084	16.5717	0	26.1226	0	7.87079	0	0.560056	0	0	0	0	0	0	0	0	0	0	0
B1548	0	0.28	0	0	0	0	0	1.14	40.63	0	9.38	0	0	0	0	3.69	0	31.25	0	13.35	0	0	0	0	0	0.28	0	0	0	0	0	0	0
B1549	0	0	0	0.329934	0	0	0	2.92941	15.3069	0	7.16857	0	0	0	0.64987	7.16857	0	62.2076	0	3.25935	0	0.979804	0	0	0	0	0	0	0	0	0	0	0
B1550	0	0	0	3.61036	0	0	0	16.8717	43.3743	0	16.8717	0	0	0	3.61036	9.64096	0	2.41024	0	2.41024	0	0	0	0	0	0	0	0	0	0	0	1.20012	0
B1957	0	0	0	3.13031	0	0	0	2.51025	69.2869	0	12.2312	3.13031	0	0	0	6.58066	0	0	0	2.82028	0	0	0	0	0	0	0	0	0	0	0	0.310031	0
B1958	0	0	0	4.94	0	0	0	5.35	64.2	0	16.87	0.82	0	0	0	5.35	0	0	0	2.47	0	0	0	0	0	0	0	0	0	0	0	0	0
B1959	0	0	0	6.93069	0	0	0	0	25.0025	0	5.72057	0	0	0	0	3.0103	0	25.6026	0	28.3128	0	0	0	0	0	0	0	0	0	0	0	5.42054	0
B1960	0	0	0	3.58928	0	0	0	0.39992	34.2531	0	5.17896	1.19976	0	0	0	2.38952	0	18.7263	0	15.9368	0	0	0	0	0	0.39992	0	0	0	0	0	17.9264	0
B1961	0	0	0	2.48975	0	0	0	0.359964	45.9054	0	7.46925	2.13979	0	0	0	1.77982	0	23.8376	0	7.11929	0	0	0	0	0	0	0	0	0	0	0	8.89911	0
B1962	0	0	0	2.42048	0	0	0	0	22.7646	0	1.69034	1.94039	0	0	0	0.480096	0	40.4381	0.480096	12.5925	0	0	0	0	0	0	0	0	0	0	0	16.9534	0.240048
B1963	0	0	0	2.36	0	0	0	2.36	28.3	0	7.08	0	0	0	0	5.19	0	16.03	0	33.02	0	0	0	0	0	0	0	0	0	0	0	5.66	0
B1964	0	0	0	6.12122	0	0	0	4.08082	60.5521	0	9.5219	0	0	0	0	8.5017	0	0.340068	0	10.8822	0	0	0	0	0	0	0	0	0	0	0	0	0
B1965	0	0	0	4.21	0	0	0.38	1.15	34.87	0	7.28	1.15	0	0	0	3.07	0	15.71	0	30.65	0	0	0	0	0	0	0	0	0	0	0	1.53	0
B1966	0	0	0	6.85	0	0	0	3.12	70.72	0	14.02	0.31	0	0	0.62	2.18	0	0	0	2.18	0	0	0	0	0	0	0	0	0	0	0	0	0
B1967	0	0	0	3.31967	0	0	0	0.29997	15.1085	0	4.22958	0	0	0	0	1.20988	0	45.3155	0	25.6774	0	0.909909	0	0	0	0	0	0	0	0	0	3.62964	0.29997
B1968	0	0	0	2.32	0	0.29	0	0	6.09	0	1.45	0.29	0	0	0	1.74	0	31.01	0.29	51.01	0	0	0	0.29	0	0.29	0	0.29	0	0	0	4.64	0
B1969	0	0	0	1.38	0	0	0	0	25.69	0.46	1.83	0.92	0	0	0	0	0	23.85	0	38.99	0	0	0	0.46	0	0.46	0	0	0	0	0	5.96	0
B1970	0	0	0	1.07989	0	0	0	0.359964	21.5078	0	2.14979	0	0	0	0	2.50975	0	18.6381	0	45.1555	0	0.359964	0	0.359964	0	1.42986	0	0	0	0	0	6.44936	0
B1971	0	0	0	1.47	0	0	0	0	33.53	0	7.65	1.76	0	0	0	6.47	0	14.41	0	27.06	0	0	0	0	0	0.59	0	0	0	0	0	7.06	0
B1972	0	0	0	4.38199	0	0	0	4.38199	67.1603	0	13.1359	0.725295	0	0	0.725295	0	0	0	0	8.02861	0	0	0	0	0	0	0	0	0	0	0	1.46066	0
B1973	0	0	0	0.889911	0	0	0	0	3.84962	0	3.24968	0	0	0	0	0.889911	0	59.4641	0.29997	22.1878	0	2.65973	0	0.29997	0	0	0	0	0	0	0	5.0295	1.17988
B1974	0	0	0	0.90027	0.450135	0	0	0.450135	9.95299	0	2.71081	0	0	0	0	0.90027	0	35.3006	0	26.2479	0	0	0	0	0	0	0	0	0	0	0	23.0869	0
B1975	0	0	0	5.0295	0	0	0	5.0295	60.374	0	16.9783	1.88981	0	0	0	8.17918	0	0	0	2.51975	0	0	0	0	0	0	0	0	0	0	0	0	0
B1976	0	0	0	3.14969	0	0.789921	0	27.5572	22.0478	0	16.5383	1.56984	0	0	0	23.6176	0	0.789921	0	2.35976	0	0	0	0	0	0.789921	0	0	0	0	0	0.789921	0
B1977	0	0	0	0.350105	0.350105	0	0.350105	9.54286	19.0857	0	2.83085	1.41042	0	0	2.47074	19.4358	0	31.0993	0	10.6032	2.12064	0	0	0	0	0.350105	0	0	0	0	0	0	0
B1978	0	0.40004	0	0.80008	0	0	0	6.0206	14.4614	0	3.21032	0	0	0	1.61016	24.5025	0	43.3743	0	5.62056	0	0	0	0	0	0	0	0	0	0	0	0	0
B1979	0	0	0	0.370037	0	0	0	0.750075	8.61086	0	8.61086	1.50015	0	0	0	18.7319	0	35.5836	0	22.4722	0	0	0	0	0	3.37034	0	0	0	0	0	0	0
B1980	0	0	0	0	0	0	0	0.970097	15.5316	0	2.59026	0.650065	0	0	0	24.6025	0	40.454	0	11.9712	0	0	0	0	0	2.91029	0	0	0	0	0	0	0.320032
B1981	0	0.230023	0	0	0	0	0	0.920092	19.4019	0	2.77028	0.460046	0	0	0	30.253	0	26.7927	0	19.1719	0	0	0	0	0	0	0	0	0	0	0	0	0
B1982	0	0	0	0.590059	0	0	0	0.290029	29.623	0	7.33073	0.590059	0	0	2.93029	38.1238	0	11.1411	0.290029	6.16062	1.17012	1.17012	0	0	0	0.590059	0	0	0	0	0	0	0
B1983	0	0	0	0	0	0	0	1.06	32.1	0	9.28	0.8	0	0	0	35.54	0	13.79	0	6.9	0	0	0	0	0	0.53	0	0	0	0	0	0	0
B1984	0	0.739926	0	0	0	0	0	0	32.7567	0	9.35906	2.21978	0	0	0.739926	29.0571	0	14.5285	0	9.60904	0	0	0	0	0	0.989901	0	0	0	0	0	0	0
B1985	0	0	0	0.53	0	0	0	9.52	11.11	0	2.65	0	0	0	0	3.17	0	53.44	1.59	12.17	0	0	0	0	0	5.82	0	0	0	0	0	0	0
B1988	0	0	0	0.27	0	0	0	0.81	26.22	0	5.41	2.16	0	0	0	18.65	0	32.7	0	13.51	0	0	0	0	0	0	0	0.27	0	0	0	0	0
B1989	0	0.690069	0	0.340034	0	0	0	1.0301	55.6756	0	6.87069	2.06021	0	0	4.12041	10.6511	0	13.7514	1.0301	3.09031	0	0.690069	0	0	0	0	0	0	0	0	0	0	0
B1990	0	0	0	0	0	0	0	0.879912	30.497	0	6.15938	2.92971	0	0	0	53.0747	0	4.9895	0.589941	0.589941	0.289971	0	0	0	0	0	0	0	0	0	0	0	0
B1991	0	0.28	0	0	0	0	0	1.13	32.01	0	3.68	1.42	0	0	0	28.05	0	29.75	0.57	2.83	0	0	0	0	0	0.28	0	0	0	0	0	0	0
B1992	0	0.25	0	0	0	0	0	0.25	30.83	0	5.01	1	0	0	0.25	19.05	0	36.34	0	6.52	0	0	0	0	0	0.5	0	0	0	0	0	0	0
B1993	0	0.269973	0	0.269973	0	0	0	0.819918	45.9154	0	5.9794	0.819918	0	0	0	8.14919	0	33.1567	0	4.61954	0	0	0	0	0	0	0	0	0	0	0	0	0
B1994	0	0	0	0	0	0	0	8.60914	32.4068	0	4.55954	1.26987	0	0	0	15.1885	0	13.6686	0	23.7976	0	0	0	0.249975	0	0.249975	0	0	0	0	0	0	0
B1995	0	0	0.26	0	0	0	0.26	12.24	54.34	0	7.65	2.55	0	0	0.26	7.14	0	11.22	0	4.08	0	0	0	0	0	0	0	0	0	0	0	0	0
B1996	0	0	0	0	0	0	0	0.35	27.27	0	7.69	0.7	0	0	0	33.92	0	16.78	0	12.59	0	0	0	0	0	0.35	0	0	0	0	0.35	0	0
B1997	0	0.21	0	0	0	0	0	0.21	15.06	0.21	3.14	0	0	0	0	40.79	0	19.25	0	21.13	0	0	0	0	0	0	0	0	0	0	0	0	0
B1998	0	0.290029	0	0	0	0	0	0	54.1254	0	5.59056	0.590059	0	0	0	6.76068	0	25.8826	0	6.76068	0	0	0	0	0	0	0	0	0	0	0	0	0
B1999	0	0.17	0	0.35	0	0	0	1.4	44.85	0	6.11	0.87	0	0	0	11.69	0	23.74	0	10.82	0	0	0	0	0	0	0	0	0	0	0	0	0
B2010	0	0	0	0.330066	0	0	0	0.820164	22.2645	0	1.80036	1.96039	0	0	0.65013	8.84177	0	55.6511	0.980196	5.40108	0.65013	0.65013	0	0	0	0	0	0	0	0	0	0	0
B2011	0	0	0	0	0	0	0	1.98	58.52	0	5.68	4.94	0	0	0.99	11.6	0	13.33	1.23	0.49	0	0.99	0	0	0	0.25	0	0	0	0	0	0	0
B2012	0	0	0	0	0	0	0	0.889911	55.0245	0	6.20938	5.0295	0	0	1.77982	9.75902	0	15.6784	1.17988	3.24968	0.29997	0.29997	0	0	0	0.29997	0.29997	0	0	0	0	0	0
B2013	0	0	0	0.409959	0	0	0	3.65963	41.0559	0	6.90931	2.84972	0	0	0	11.7888	0	17.4783	0	15.8484	0	0	0	0	0	0	0	0	0	0	0	0	0
B2014	0	0	0	0	0	0	0	1.08989	24.5875	0	3.82962	0	0	0	0	2.18978	0	34.4266	1.08989	32.2368	0	0	0	0	0	0.549945	0	0	0	0	0	0	0
B2015	0	0	0	0	0	0	0	0	64.29	0	9.09	0.65	0	0	0.65	7.79	0	6.49	0	10.39	0	0	0	0	0	0	0	0	0	0	0.65	0	0
B2016	0	0	0	0.6	0	0	0	1.81	71.99	0	4.22	1.51	0	0	0.3	8.73	0	4.52	0	6.02	0	0	0	0	0	0	0	0	0	0	0.3	0	0
B2017	0	0	0	0	0	0	0	8.64086	77.7878	0	3.70037	1.85019	0	0	1.85019	3.09031	0	1.85019	0	1.23012	0	0	0	0	0	0	0	0	0	0	0	0	0
B2018	0	0.59	0	0.29	0	0	0	0.29	50.73	0	4.11	6.16	0	0	2.64	24.05	0	4.98	1.47	3.23	0	0.29	0	0	0	0	0	0	0	0	0	1.17	0
B2019	0	0	0	0.570114	0	0	0	0.290058	55.181	0	5.46109	8.91178	0	0	1.72034	19.2539	0	4.0208	1.15023	2.0104	0	0.860172	0	0	0	0	0	0	0	0	0	0.570114	0
B2020	0	0	0	0.289942	0	0	0	0	33.5233	0	4.33913	3.75925	0	0	1.15977	24.2751	0	15.5969	3.46931	9.82803	0.869826	2.30954	0	0	0	0.289942	0	0	0	0	0	0.289942	0
B2021	0	0	0	0	0	0	0	0	30.9538	0	6.18876	3.40932	0	0	1.23975	11.1478	0	30.024	1.85963	9.90802	3.40932	1.54969	0	0	0	0.309938	0	0	0	0	0	0	0
B2022	0	0	0	0	0	0	0	1.44986	58.0842	0	6.06939	5.77942	0	0	2.88971	15.3185	0	5.77942	1.15988	2.0198	0.289971	0.869913	0	0	0	0.289971	0	0	0	0	0	0	0
B2071	0	0	0	2.02	0	0	0	0	18.44	0	4.03	0.86	0	0	0.29	4.61	0	35.16	6.63	12.1	0.58	3.17	0.29	0	0	0	0	0	0	0	0.29	10.09	1.44
B2073	0	0.310031	0	1.54015	0	0	1.23012	45.3745	11.1111	0	1.54015	1.54015	0	0	2.16022	35.1935	0	0	0	0	0	0	0	0	0	0	0	0	0	0	0	0	0
B2086	0	0	0	0.25	0	0	0	3.93	2.7	0	1.23	1.72	0	0	0.25	10.07	0	39.31	0	36.12	0.98	2.21	0	0	0	1.23	0	0	0	0	0	0	0
B2087	0	0	0	0	0	0	0	1.22988	4.42956	0	2.21978	0.739926	0	0	0.249975	12.8087	0	66.7433	0.249975	10.339	0	0	0	0	0	0.989901	0	0	0	0	0	0	0
B2088	0	0	0	0	0	0	0	0.89991	1.78982	0	0.89991	0.29997	0	0	0	21.7878	0	52.2348	0	19.3981	0	0	0	0	0	2.68973	0	0	0	0	0	0	0
B2089	0	0	0	0	0	0	0	1.0199	3.72963	0	3.0497	0.339966	0	0	0	11.5288	0	67.1133	0	10.5089	0	0	0	0	0	2.70973	0	0	0	0	0	0	0
B2090	0	0	0	0	0	0	0	1.53985	4.91951	0	2.14979	0.309969	0	0	0	3.9996	0	75.3825	0.309969	11.0789	0	0	0	0	0	0.309969	0	0	0	0	0	0	0
B2091	0	0	0	0	0	0	0	2.01	10.63	0	3.16	0.29	0	0	0	7.47	0	66.38	0.29	9.48	0	0	0	0	0	0.29	0	0	0	0	0	0	0
B2092	0	0	0	0	0	0	0	0	13.5586	0	3.78962	0	0	0	0	17.3483	0	59.934	0.949905	4.09959	0	0	0	0	0	0.319968	0	0	0	0	0	0	0
B2093	0	0	0	0	0	0	0	0.86	9.22	0	1.44	0	0	0	0.29	15.85	0	68.3	0.58	3.46	0	0	0	0	0	0	0	0	0	0	0	0	0
B2094	0	0	0	0	0	0	0	0.879912	28.5071	0	3.94961	0.879912	0	0	0	14.4686	0	46.0554	0	5.25947	0	0	0	0	0	0	0	0	0	0	0	0	0
B2105	0	0.889911	0	0	0	0	0	0	8.27917	0	0.449955	0.449955	0	0	0	15.4385	0	31.0969	3.12969	38.9261	0	0	0	0	0	0	0	0	0	0.669933	0	0.669933	0
B2106	0	0	0	0	0	0	0	0	2.11979	0	0	0	0	0	0	21.2179	0	45.6254	2.38976	28.6471	0	0	0	0	0	0	0	0	0	0	0	0	0
B2107	0	0	0	0	0	0	0	0.260026	17.3717	0	0.790079	0.530053	0	0	0	30.263	0	42.8943	2.63026	5.0005	0	0	0	0	0	0.260026	0	0	0	0	0	0	0
B2108	0	0	0	1.15988	0	0	0	1.92981	67.1733	0	13.1287	5.40946	0	0	1.15988	5.40946	0	3.08969	0	1.53985	0	0	0	0	0	0	0	0	0	0	0	0	0
B2132	0	0	0	0	0	0	0	0	36.67	0	6.67	0	0	0	3.33	3.33	0	6.67	3.33	36.67	0	0	0	0	0	0	0	0	0	0	0	3.33	0
Z2134	0	0	0	0	0	0	0	0	10.419	0	4.16958	0	0	0	0	0	0	47.9152	0	24.9975	0	12.4988	0	0	0	0	0	0	0	0	0	0	0
B2140	0	0	0	6.8	0	0	0	0	35.6	0	9.39	0.32	0	0	1.29	4.85	0	3.23	0	29.45	0.65	4.21	0.65	0	0	0	0	0	0	0	0.32	3.24	0
Z2144	0	0	0	1.06021	0	0	0	0	67.0334	0	1.06021	0	0	0	0	0	0	27.6655	1.06021	1.06021	0	0	0	0	0	0	0	0	0	0	0	1.06021	0
Z2145	0	0	0	0	0	0	0	0	46.6147	0	2.54025	0	0	0	0	3.39034	0	22.8823	2.54025	16.9417	0	0	0	0	0	0	0.850085	0	0	0	0	4.24042	0
Z2146	0	0	0	0	0	0	0	0	21.86	0	0	0	0	0	0	0	0	44.26	7.65	22.4	0	0	0	0	0	0	0	0	0	0	0	3.83	0
Z2147	0	0	0	0	0	0	0	0	20.43	0	0	0	0	0	0	2.15	0	30.11	10.75	33.33	0	0	0	0	0	0	0	0	0	0	0	3.23	0
Z2148	0	0	0	0	0	0	0	0	0.72	0	0	0	0	0	0	0	0	48.92	15.11	25.9	0	1.44	0	0	0	0	0	0	0	0	0	7.91	0
Z2149	0	0	0	0.630063	0	0	0	0	1.27013	0	0.630063	0	0	0	0	3.16032	0	53.1653	19.622	15.1915	0	0	0	0	0	0	0	0	0	0	0	6.33063	0
B2151	0	0	0	0	0	0	0	0	20.65	0	6.77	1.61	0	0	0.32	16.45	0	50.65	0	3.55	0	0	0	0	0	0	0	0	0	0	0	0	0
B2152	0	0	0	0	0	0	0	0	21.7922	0	5.07051	1.19012	0	0	0.30003	11.0411	0	52.5453	0	7.76078	0	0	0	0	0	0.30003	0	0	0	0	0	0	0
B2153	0	0	0	0	0	0	0	0	26.4253	0	4.0108	0.330066	0	0	0	18.3937	0	47.4995	0	3.34067	0	0	0	0	0	0	0	0	0	0	0	0	0
B2154	0	0	0	0	0	0	0	0.29997	25.0775	0	5.13949	1.50985	0	0	1.20988	19.0281	0	42.2958	0	5.43946	0	0	0	0	0	0	0	0	0	0	0	0	0
B2155	0	0	0	0	0	0	0	0	5.54	0	3.78	1.01	0	0	0.25	11.84	0	68.26	0	8.06	0	0	0	0	0	1.26	0	0	0	0	0	0	0
B2156	0	0	0	0	0	0	0	0.229954	28.4043	0	7.72845	2.4995	0	0	0.679864	12.7275	0	40.4519	0	7.04859	0	0	0	0	0	0.229954	0	0	0	0	0	0	0
B2157	0	0	0	0	0	0	0	0	1.35027	0	4.05081	1.35027	0	0	1.35027	4.05081	0	43.2486	0	41.8984	0	0	0	0	0	2.70054	0	0	0	0	0	0	0
B2163	0	0	0	0	0	0	0	1.0099	2.26977	0	0.759924	1.0099	0	0	0.249975	14.8985	0	66.4134	0.249975	11.6188	0	0	0	0	0	1.51985	0	0	0	0	0	0	0
2187	0	0	0	0	0	0	0.690069	1.39014	5.56056	0	0.690069	0	0	0	0	0.690069	0	37.5038	0.690069	49.3149	0	1.39014	0	0	0	0.690069	0	0	0	0	0	1.39014	0
2188	0	0	0	1.0299	0	0	0	4.63954	12.8887	0	7.21928	2.57974	0	0	0	0	0	63.3937	0	5.66943	0	0	0	0	0	2.57974	0	0	0	0	0	0	0
2189	0	0	0	0	0	0	0	0	3.70037	0	0	0	0	0	0	0	0	18.5219	0	74.0774	0	0	0	0	0	3.70037	0	0	0	0	0	0	0
2190	0	0	0	0	0	0	0	0	16.1916	0	1.9902	0.570057	0	0	0	0.280028	0	58.2458	0	22.1622	0	0	0	0	0	0.280028	0	0	0	0	0	0.280028	0
2191	0	0	0	0	0	0	0	0	18.6581	0	3.20968	1.74983	0	0	0	0.289971	0	50.7249	0.289971	23.6176	0	1.16988	0	0	0	0.289971	0	0	0	0	0	0	0
2192	0	0	0	0	0	0	0	0	11.3811	0	2.38024	0.260026	0	0	0	0	0	41.8042	0	42.5943	0	0.790079	0	0	0	0	0	0	0	0	0	0.790079	0
2193	0	0	0	0	0	0	0	0.230046	14.3229	0	2.58052	0.470094	0	0	0	0	0	62.6825	0.70014	19.0138	0	0	0	0	0	0	0	0	0	0	0	0	0
2194	0	0	0	0	0	0	0	0	22.1178	0	2.51975	3.41966	0	0	0	2.15978	0	53.7746	0.539946	14.9285	0	0.179982	0	0	0	0	0	0	0	0	0	0.359964	0
2195	0	0	0	0.31	0	0	0	0	21.67	0	1.24	0.62	0	0	0	0	0	52.01	0.93	21.67	0	0.93	0	0	0	0	0	0	0	0	0	0.62	0
2196	0	0	0	0	0	0	0	0	24.2	0	1.8	1.2	0	0	0	0.4	0	58.8	0.4	12.8	0	0	0	0	0	0	0	0	0	0	0	0.4	0
2197	0	0	0	4.88	0	0	0	1.63	65.04	0	17.07	0	0	0	0	2.44	0	2.44	0	6.5	0	0	0	0	0	0	0	0	0	0	0	0	0
2198	0	0	0	0	0	0	0	4.81	72.6	0	11.54	1.44	0	0	0	1.92	0	7.21	0	0.48	0	0	0	0	0	0	0	0	0	0	0	0	0
2199	0	0	0	0.47	0	0	0	0.23	25.47	0	3.5	0	0	0	0	0	0	40.66	0	28.74	0	0.23	0	0	0	0	0	0	0	0	0	0.7	0
2200	0	0	0	1.37	0	0	0	0.27	28.14	0	4.92	0	0	0	0	0.27	0	38.8	0	25.68	0	0	0	0	0	0	0	0	0	0	0	0.55	0
2201	0	0	0	0.629937	0	0	0	0	3.52965	0	1.25987	0	0	0	0	0.129987	0	67.3733	0.249975	26.0674	0	0.379962	0	0	0	0	0	0	0	0	0	0.379962	0
2202	0	0	0	0.409959	0	0	0	0	14.4886	0	0	1.0399	0	0	0	0.619938	0	9.52905	0	71.4229	0.209979	0	0	0	0	0	0	0	0	0	0	2.27977	0
2203	0	0	0	0.359964	0	0	0	0	5.37946	0	0	0.359964	0	0	0	0	0	5.37946	0	81.7118	1.78982	1.07989	0	0	0	1.42986	0	0	0	0	0	2.50975	0
2204	0	0	0	0	0	0	0	0	6.88931	0	0.659934	0	0	0	0	0	0	7.85921	0.329967	80.6519	0.979902	0.659934	0	0	0	0	0	0	0	0	0	1.9698	0
2205	0	0	0	0	0	0	0	0	8.32917	1.51985	0.759924	0.759924	0	0	0	0	0	11.3689	0	71.9628	0	0	0	0	0	0	0	0	0	0	0	5.29947	0
2206	0	0	0	0	0	0	0	0	11.17	0	0.53	1.6	0	0	0	0	0	11.17	0	72.87	0	0	0	0	0	0	0	0	0	0	0	2.66	0
2207	0	0	0	3.83962	0	0	0	0	16.9883	0	2.46975	1.63984	0	0	0	0	0	24.1076	0	46.0254	0	0	0	0	0	0.549945	0	0	0	0	0	4.37956	0
2208	0	0	0	0	0	0	0	0	32.2932	0	3.47035	1.56016	0	0	0	1.22012	0	21.0021	0.350035	36.2836	0	1.0401	0	0	0	0.350035	0	0	0	0	0	2.43024	0
2209	0	0	0	0.20002	0	0	0	0	18.0218	0	2.83028	1.21012	0	0	0	0.20002	0	22.0622	0	45.1445	0.20002	0.610061	0	0	0	0	0	0	0	0	0	8.91089	0.610061
2210	0	0	0	0.259974	0	0	0	0	23.5576	0	1.82982	0.789921	0	0	0	0	0	24.0876	0.789921	38.2162	0	0.789921	0	0	0	0.259974	0	0	0	0	0	8.89911	0.519948
H130	0	0	0	0	0	0	0	0	14.57	0	7.06	0.31	0	0	0	16.1	0	13.19	0	48.62	0	0	0	0	0	0.15	0	0	0	0	0	0	0
H131	0	0	0	0	0	0	0	0	12.1988	0	6.58934	0.239976	0	0	0	18.5381	0	13.6586	0	48.7751	0	0	0	0	0	0	0	0	0	0	0	0	0
H132	0	0	0	0	0	0	0	0	6.0206	0	2.21022	0.20002	0	0	0	5.62056	0	30.5231	0	55.4255	0	0	0	0	0	0	0	0	0	0	0	0	0
H133	0	0	0	0	0	0	0	0	17.4183	0	9.27907	0.679932	0	0	0.679932	22.3978	0	11.7588	0	33.7066	0	0	0	0	0	0.229977	0	0	0	0	0	3.84962	0
H134	0	0	0	0.879912	0	0	0	0	30.5469	0	9.44906	1.09989	0	0	0	40.8759	0	4.83952	0	9.22908	0	0	0	0	0	0	0	0	0	0	0	3.07969	0
H135	0	0	0	0.219978	0	0	0	0	13.1287	0	9.62904	0.219978	0	0	0.439956	25.3775	0	25.3875	0	24.0676	0	0	0	0	0	0	0	0	0	0	0	1.52985	0
H136	0	0	0	5.09	0	0	0	0	39.69	0	15.27	1.78	0	0	0	22.14	0	2.8	0	12.21	0	0	0	0	0	0	0	0	0	0	0	1.02	0
H137	0	0	0	5.54	0	0	0	0	55.42	0	9.16	3.13	0	0	0.48	21.45	0	0	0	4.82	0	0	0	0	0	0	0	0	0	0	0	0	0
H138	0	0	0	7.52075	0	0	0	0	45.4545	0	7.21072	0.940094	0	0	0.310031	34.8035	0	0	0	3.76038	0	0	0	0	0	0	0	0	0	0	0	0	0
H139	0	0	0	2.55949	0	0	0	0	52.0696	0	6.38872	1.27974	0	0	0	19.4861	0	8.94821	0	9.26815	0	0	0	0	0	0	0	0	0	0	0	0	0
H140	0	0	0	0.560056	0	0	0	0	12.0512	0	1.69017	0.380038	0	0	0	76.6577	0	4.52045	0	4.14041	0	0	0	0	0	0	0	0	0	0	0	0	0
H141	0	0	0	0	0	0	0	0	2.29023	0	0.570057	4.76048	0	0	0	88.7689	0	1.52015	0	1.90019	0	0	0	0	0	0.190019	0	0	0	0	0	0	0
H142	0	0	0	0	0	0	0	0	1.46	0	0.87	2.92	0	0	0	90.38	0	2.62	0	1.75	0	0	0	0	0	0	0	0	0	0	0	0	0
H143	0	0	0	0	0	0	0	0	3.77962	0	0.9999	0.19998	0	0	0	85.4515	0	3.78962	0	2.38976	0	0	0	0	0	0	0	0	0	0	0	3.38966	0
H144	0	0	0	0	0	0	0	0	1.90019	0	0.950095	0	0	0	0	95.2495	0	1.33013	0	0.570057	0	0	0	0	0	0	0	0	0	0	0	0	0
H145	0	0	0	0.2	0	0	0	0	3.36	0	2.57	0.2	0	0	0	88.34	0	1.18	0	4.15	0	0	0	0	0	0	0	0	0	0	0	0	0
H146	0	0	0	0	0	0	0	0	9.4	0	3	2	0	0	0.4	83.6	0	0.4	0	1.2	0	0	0	0	0	0	0	0	0	0	0	0	0
H147	0	0	0	0	0	0	0	0	9.74903	0	2.72973	2.33977	0	0	0	84.7915	0	0	0	0.389961	0	0	0	0	0	0	0	0	0	0	0	0	0
H148	0	0	0	0.19	0	0	0	0	4.98	0	2.11	2.87	0	0	0	89.85	0	0	0	0	0	0	0	0	0	0	0	0	0	0	0	0	0
H1109	0	0	0	0	0	0	0.2	0	5.6	0	0.4	1	0	0	0	90.2	0	1.6	0	1	0	0	0	0	0	0	0	0	0	0	0	0	0
H1110	0	0	0	0	0	0	0	0	6.61	0	1.28	0.37	0	0	0	90.46	0	0.55	0	0.73	0	0	0	0	0	0	0	0	0	0	0	0	0
H1111	0	0	0	1.59016	0	0	0	0	62.1062	0	4.14041	1.27013	0	0	0	20.062	0	5.41054	0	2.55026	0	0	0	0	0	0	0	0	0	0	0	2.87029	0
H1112	0	0	0	1.91962	0	0	0	0	49.5101	0	9.26815	1.91962	0	0	0	22.6755	0	5.11898	0	2.87942	0	0	0	0	0	0	0	0	0	0	0	6.70866	0
H1113	0	0	0	1.27	0	0	0	0	48.89	0	15.24	3.17	0	0	0	7.62	0	9.84	0	4.44	0	0	0	0	0	0.32	0	0	0	0	0	9.21	0
H1114	0	0	0	2.6	0	0	0	0	37.99	0	19.16	0.97	0	0	0	9.74	0	14.93	0	8.77	0	0	0	0	0	0	0	0	0	0	0	5.84	0
H1115	0	0	0	0	0	0	0	0	15.9716	0	13.4213	0	0	0	0	32.9133	0	19.1619	0.640064	15.9716	0	0	0	0	0	0	0	0	0	0	0	1.92019	0
H1116	0	0	0	0	0	0	0	0	0	0	0	0	0	0	0	0.32	0	44.05	0	55.63	0	0	0	0	0	0	0	0	0	0	0	0	0
H1117	0	0	0	0	0	0	0	0	21.8178	0	9.11909	0.549945	0	0	0	23.7576	0	24.8675	0.829917	18.5081	0	0	0	0	0	0	0	0	0	0	0	0.549945	0
H1118	0	0	0	0	0	0	0	0	1.88	0	0	0	0	0	0	2.51	0	59.56	0.63	35.42	0	0	0	0	0	0	0	0	0	0	0	0	0
H1119	0	0	0	0.289971	0	0	0	0	12.5687	0	4.56954	1.42986	0	0	0	46.2854	0	18.2882	0.569943	15.7084	0	0	0	0	0	0.289971	0	0	0	0	0	0	0
H1120	0	0	0	0	0	0	0	0	1.20012	0	0.30003	0	0	0	0	0	0	45.4845	0.90009	51.5152	0	0	0	0	0	0	0	0	0	0	0	0.60006	0
H1325	0	0	0	0	0	0	0	0	16.67	0	3.33	4.85	0	0	0	72.42	0	0	0	2.73	0	0	0	0	0	0	0	0	0	0	0	0	0
H1326	0	0.319968	0	0	0	0	0	0	66.5533	0	8.82912	2.83972	0	0	0	14.1986	0	0	0	7.25927	0	0	0	0	0	0	0	0	0	0	0	0	0
H1328	0	0	0	0	0	0	0	0	73.4473	0	6.77068	8.33083	0	0	1.56016	1.0401	0	0	0	8.85089	0	0	0	0	0	0	0	0	0	0	0	0	0
H1329	0	3.26	0	0	0	0	0	0	26.09	0	7.61	2.17	0	0	4.35	4.35	0	14.13	0	38.04	0	0	0	0	0	0	0	0	0	0	0	0	0
H1330	0	0	0	0	0	0	0	0	0.99	0	0	0	0	0	0	0	0	0	0	99.01	0	0	0	0	0	0	0	0	0	0	0	0	0
H1331	0	0.910091	0	0	0	0	0	0.910091	7.76078	0	3.65037	0.460046	0	0	0	0.460046	0	6.39064	0	79.4579	0	0	0	0	0	0	0	0	0	0	0	0	0
H1332	0	0	0	0	0	0	0	0	2.22	0	0	0	0	0	0	0	0	3.89	0	91.67	0	0	0	0	0	0	0	0	0	0	0	2.22	0
H1333	0	0	0	0	0	0	0	0	21.23	0	8.62	2.15	0	0	0.92	3.08	0	1.54	0	62.46	0	0	0	0	0	0	0	0	0	0	0	0	0
H1334	0	0	0	0	0	0	0	0	22.61	0	3.19	0.29	0	0	0.58	70.72	0	0	0	2.61	0	0	0	0	0	0	0	0	0	0	0	0	0
H1335	0	0	0	0	0	0	0	0	16.15	0	3.73	8.07	0	0	0.62	61.49	0	0.62	0	9.32	0	0	0	0	0	0	0	0	0	0	0	0	0
H1336	0	0	0	0	0	0	0	0	6.72067	0	1.88019	6.45065	0	0	0	83.6084	0	0	0	1.34013	0	0	0	0	0	0	0	0	0	0	0	0	0
H1337	0	0	0	0	0	0	0	0	3.16	0	0.95	0.95	0	0	0	93.04	0	0.63	0	1.27	0	0	0	0	0	0	0	0	0	0	0	0	0
H1338	0	0	0	0	0	0	0	0	5.39	0	0.9	2.99	0	0	0	85.33	0	0.3	0	4.79	0	0	0	0	0	0	0	0	0	0	0	0.3	0
H1339	0	0	0	0	0	0	0	0	6.41	0	1.6	3.21	0	0	1.28	86.86	0	0	0	0.64	0	0	0	0	0	0	0	0	0	0	0	0	0
H1340	0	0	0	0	0	0	0	0	6.83068	0	1.24012	0.310031	0	0	0	83.8584	0	0.620062	0	6.52065	0	0	0	0	0	0	0	0	0	0	0	0.620062	0
H1341	0	0	0	1.53985	0	0	0	0	47.6852	0	13.8486	9.22908	0	0	3.07969	21.5378	0	0	0	3.07969	0	0	0	0	0	0	0	0	0	0	0	0	0
H1342	0	0	0	0	0	0	0	0	71.04	0	5.07	4.78	0	0	0.6	5.07	0	0.9	0	11.94	0	0	0	0	0	0	0	0	0	0	0	0.6	0
H1343	0	0	0	0	0	0	0	0	54.3046	0	7.9892	3.82962	0	0	2.55974	0.639936	0	1.91981	0	28.1172	0	0	0	0	0	0	0	0	0	0	0	0.639936	0
H1344	0	0	0	0.31	0	0	0	0	55.73	0	12.38	4.33	0	0	3.1	0.31	0	0	0	21.98	0	0	0	0	0	0	0	0	0	0	0	1.86	0
H1345	0	0	0	0	0	0	0	0	61.7938	0	12.3588	14.6085	0	0	3.36966	0	0	0	0	7.86921	0	0	0	0	0	0	0	0	0	0	0	0	0
H1370	0	0	0	0.19	0	0	0	0	5.5	0	2.85	0	0	0	0	89.75	0	1.14	0	0.57	0	0	0	0	0	0	0	0	0	0	0	0	0
H1371	0	0	0	0	0	0	0	0	4.51	0	2.82	1.97	0	0	0.56	89.86	0	0	0	0.28	0	0	0	0	0	0	0	0	0	0	0	0	0
D2044	0	0	0.4	0	1.2	0	0	0	13.6	0	6.8	0.8	0	0	0	16	0	7.2	0	50.4	0	2	0	0	0	0.8	0	0	0	0	0	0.8	0
D2045	0	0	0	2.01	0	0	0	0	3.36	0	1.34	0	0	0	0	9.4	0	23.49	0	58.39	0	2.01	0	0	0	0	0	0	0	0	0	0	0
G037	0.359928	0.359928	0	0	0	0	0	1.42971	6.42871	0	3.56929	3.92921	0	0	0.359928	7.85843	0	7.85843	0	64.987	0	0	0	0	0	2.85943	0	0	0	0	0	0	0
G038	0.620062	0	0	0	0	0	0	0.620062	6.21062	0	3.11031	4.35044	0	0	0.620062	13.0413	0	13.0413	0	56.5257	0	0	0	0	0	1.86019	0	0	0	0	0	0	0
G039	0	0	0	0	0	0	0	0	2.24978	0	1.28987	2.24978	0	0	0	6.10939	0	9.969	0	76.5223	0	0	0	0	0	1.60984	0	0	0	0	0	0	0
G040	0	0.28	0	0	0	0	0	1.93	11.29	0	2.2	4.96	0	0	1.65	26.17	0	9.37	0	41.32	0	0	0	0	0	0.83	0	0	0	0	0	0	0
G041	0	1.51015	0	0	0	0	0	0.750075	12.0812	0	2.64026	8.68087	0	0	1.51015	32.4532	0	7.17072	0	30.9431	0	0	0	0	0	2.26023	0	0	0	0	0	0	0
G043	0.37	1.11	0	0	0	0	0	1.11	7.41	0	0.74	1.85	0	0	0	18.15	0	9.26	0	60	0	0	0	0	0	0	0	0	0	0	0	0	0
G044	1.2	0.8	0	0	0	0	0	2.39	8.76	0	1.99	3.98	0	0	0	17.53	0	12.35	0	50.6	0	0	0	0	0	0.4	0	0	0	0	0	0	0
G045	0	0.239976	0	0	0	0	0	1.68983	15.2185	0	2.65973	3.13969	0	0	2.89971	12.3188	0	17.1483	0	41.7858	0	0	0	0	0	2.89971	0	0	0	0	0	0	0
G046	0.410082	1.24025	0	0	0	0	0	0.410082	9.09182	0	4.13083	3.72074	0	0	0	21.0742	0	23.1446	0	35.127	0	0	0	0	0	1.65033	0	0	0	0	0	0	0
G047	0.280056	1.42028	0	0	0	0	0	1.71034	12.5425	0	5.41108	5.9812	0	0	0.85017	27.9256	0	10.5421	0	31.3463	0	0	0	0	0	1.9904	0	0	0	0	0	0	0
G048	0.29997	2.37976	0	0	0	0	0	1.48985	8.92911	0	2.67973	7.43926	0	0	0.29997	45.5354	0	3.26967	0	26.1874	0	0	0	0	0	1.48985	0	0	0	0	0	0	0
G050	0.27	0	0	0	0	0	0	2.99	8.15	0	2.45	2.72	0	0	0.54	28.8	0	16.58	0	36.41	0	0	0	0	0	1.09	0	0	0	0	0	0	0
G061	0	0.529947	0	0	0	0	0	21.1079	37.4663	0	2.89971	5.0095	0	0	3.9596	20.318	0	1.05989	0	7.64924	0	0	0	0	0	0	0	0	0	0	0	0	0
L087	0.20004	0.20004	0.20004	0.60012	0.20004	0	2.0204	51.4203	27.4255	0.20004	0.40008	2.22044	0	0	0	12.9026	0	0.20004	0	1.21024	0	0	0	0	0	0.60012	0	0	0	0	0	0	0
L088	0	0	0.679932	0	0	0	1.35986	71.5228	13.2187	0	1.0199	0	0	0	0	5.75942	0	0.679932	0	5.07949	0	0	0	0	0	0.679932	0	0	0	0	0	0	0
L089	0	0	0	0	0	0	4.35044	42.2442	17.7018	0	0.310031	0.310031	0	0	0	2.17022	0	6.52065	0	24.8425	0	0	0	0	0	1.55016	0	0	0	0	0	0	0
L093	0	0.589941	0.19998	0.779922	0.589941	0	0.979902	49.895	26.0274	0	0.389961	0	0	0	0	18.1982	0	0	0	2.14979	0	0	0	0	0	0	0.19998	0	0	0	0	0	0
L094	0	0.219978	0	0.439956	0	0	2.62974	40.036	25.5974	0	0	1.9698	0	0	0	14.4386	0.219978	0.659934	0	9.62904	0	0.879912	0	0	0	1.74983	1.08989	0	0	0	0.439956	0	0
L152	0	0.319936	0.109978	0.64987	0.219956	0	0.759848	47.3505	33.2234	0	0.539892	2.58948	0	0	0.219956	10.028	0	0.109978	0	3.12937	0	0	0	0	0	0.319936	0.109978	0	0	0	0.319936	0	0
S158	0	0	0	0.379962	0	0	0	15.6484	7.62924	0	1.14989	0	0	0	0	1.52985	0	6.10939	0	67.1733	0	0	0	0	0	0.379962	0	0	0	0	0	0	0
S159	0	0	0	0	0	0	0	10	9	0	0	0	0	0	0	0	0	9	0	71	0	0	0	0	0	1	0	0	0	0	0	0	0
S160	0	0	0	0	0	0	0	0.98	2.94	0	0	1.96	0	0	0	1.96	0	23.53	0	67.65	0	0	0	0	0	0.98	0	0	0	0	0	0	0
L162	0	0	0	2.23955	0	0	0	61.9276	0.74985	0	0.74985	0	0	0	0	14.927	0	0.74985	0	17.1566	0	0	0	0	0	0.74985	0	0	0	0	0.74985	0	0
L163	0	0	0	0	0	0	2.05021	57.9558	6.15062	0	0	0	0	0	0	11.2811	0	2.56026	0	15.9016	0	0	0	0	0	3.59036	0	0	0	0	0.510051	0	0
L164	0	0	0	1.44014	0	0	0.480048	59.1359	6.25063	0	0.960096	0	0	0	0	9.62096	0	2.40024	0	17.3117	0	0	0	0	0	2.40024	0	0	0	0	0	0	0
Z735	0	0	0	0.85017	0.85017	0	0	6.84137	10.2621	0	1.71034	0.85017	0	0	0	0	0	19.6639	0	54.7109	0	2.56051	0	0	0.85017	0	0	0	0	0	0	0.85017	0
G1347	0	0	0	0	0	0	0	6.86931	5.66943	0	8.9591	2.9897	0	0	0.59994	43.2757	0	7.45925	0	12.5387	0	0	0	0	0	11.6388	0	0	0	0	0	0	0
G1348	0	0	0	0	0	0	0	5.71	7.61	0	6.79	3.8	0	0	0	54.35	0	4.34	0	10.33	0	0	0	0	0	7.07	0	0	0	0	0	0	0
G1349	0	0	0	0	0	0	0	4.18958	4.18958	0	3.92961	2.61974	0	0	0.259974	24.3476	0	8.37916	0	42.9257	0	0	0	0	0	9.15908	0	0	0	0	0	0	0
G1350	0	0	0	0	0	0	0	0	2.38	0	4.76	1.19	0	0	0	27.38	0	19.05	0	38.1	0	0	0	0	0	7.14	0	0	0	0	0	0	0
G1351	0	0	0	0	0	0	0	8.14081	9.50095	0	4.9805	1.81018	0	0	0.90009	35.2935	0	5.88059	0	24.8925	0	0	0	0	0	8.60086	0	0	0	0	0	0	0
G1352	0	0	0	0	0	0	0	0	13	0	6	2	0	0	1	13	0	11	0	51	0	0	0	0	0	3	0	0	0	0	0	0	0
B1482	0	0	0	0	0.480048	0	0	1.45015	12.0812	0	0	0.480048	0	0	1.45015	48.3148	0	21.7422	0	11.5912	0	0	0	0	0	1.93019	0	0	0	0	0.480048	0	0
B1485	0	0	0	0	0	0	0	0.32	27.16	0.32	7.67	0	0	0	0.32	11.18	0	47.28	0	5.75	0	0	0	0	0	0	0	0	0	0	0	0	0
B1486	0	0	0	0	0	0	0	10.5111	2.56026	0	0.510051	1.0301	0	0	0	10.5111	0	44.1044	0	23.8524	0	0	0	0	0	6.92069	0	0	0	0	0	0	0
B1493	0	0	0	0.850085	0	0	0.850085	61.9362	20.172	0	0.280028	0	0	0	1.14011	2.84028	0	4.83048	0	6.25063	0	0	0	0	0	0	0	0	0	0	0.850085	0	0
L1708	0	0	0	0	0	0	0	0	0	0	0	0	0	0	0	0	0	61.2861	0.30003	35.6736	0	0	0	0	0	0	0	0	0	0	0	2.74027	0
L1709	0	0	0	0	0	0	0	0	0	0	0	0	0	0	0	0.320032	0	53.3953	0.650065	45.6346	0	0	0	0	0	0	0	0	0	0	0	0	0
L1710	0	0	0	0	0	0	0	0	0	0	0	0	0	0	0	0	0	66.9967	1.32013	25.7426	0	0	0	0	0	0.660066	0	0	0	0	0	5.28053	0
L1711	0	0	0	0	0	0	0	0	0	0	0	0	0	0	0	0	0	49.835	2.61974	45.2455	0	0	0	0	0	0	0	0	0	0	0	2.29977	0
L1712	0	0	0	0	0	0	0	0	0	0	0	0	0	0	0	0.290029	0	73.3973	0.290029	24.5625	0	0	0	0	0	0.580058	0	0	0	0	0	0.880088	0
L1713	0	0	0	0	0	0	0	0	0	0	2.82028	8.73087	0	0	0	63.3863	0	3.66037	0	16.9017	0	0	0	0	0	3.94039	0	0	0	0	0	0.560056	0
L1714	0	0	0	0	0	0	0	0	0	0	0.31	2.75	0	0	0	55.96	0	25.38	0.61	11.93	0	0	0	0	0	2.45	0	0	0	0	0	0.61	0
L1715	0	0	0	0	0	0	0	0	0	0	0.39	2.17	0	0	0	66.73	0.39	9.84	0.79	15.95	0	0	0	0	0	3.35	0	0	0	0	0	0.39	0
L1716	0	0	0	0	0	0	0	0	0	0	0.96	2.24	0	0	0	52.4	4.15	17.57	1.28	16.29	0	0	0	0	0	4.15	0	0	0	0	0	0.96	0
L1717	0	0	0	0	0	0	0	0	0	0	0.329967	0.329967	0	0	0	25.0775	0	47.8752	1.94981	21.1779	0	0	0	0	0	2.27977	0	0	0	0	0	0.979902	0
L1718	0	0	0	0	0	0	0	0	0	0	0.329967	4.88951	0	0	0	71.3329	2.27977	5.53945	1.29987	13.3487	0	0	0	0	0	0.329967	0	0	0	0	0	0.649935	0
L1719	0	0	0	0	0	0	0	0	0	0	0.160016	2.09021	0	0	0	68.3868	0	7.38074	0.80008	16.8517	0	0	0	0	0	3.85039	0	0	0	0	0	0.480048	0
L1720	0	0	0	0	0	0	0	0	0	0	0	5.71057	0	0	0	58.1058	1.27013	12.0612	0.630063	16.1916	0	0	0	0	0	6.0306	0	0	0	0	0	0	0
B1986	0	0	0	0	0.459954	0	0	22.3678	5.0195	0	0.909909	0.459954	0	0	0	4.56954	0	35.6164	0	27.3973	0	0	0	0	0	2.73973	0	0	0	0	0	0	0.459954
B1987	0	0	0	1.03518	0	0	0.522613	18.1307	4.1407	0	1.55779	0.522613	0	0	0.522613	24.8643	0	29.5276	0	17.6181	0	0	0	0	0	1.55779	0	0	0	0	0	0	0
L2000	0	0	0	1.84037	0	0	0.520104	30.7161	1.57031	0	1.84037	0	0	0	0	9.97199	0	30.9762	0	20.7341	0	0	0	0	0	1.57031	0	0	0	0	0	0.260052	0
L2001	0	0	0.590059	1.18012	0	0	0.590059	27.8128	10.061	0	8.88089	0	0	0	1.18012	4.14041	0	20.7121	0	20.7121	0	0.590059	0	0	0	2.9603	0	0	0.590059	0	0	0	0
L2002	0	0	0	0	0	0	0	3.38	2.15	0	0.31	0	0	0	0	8.31	0	35.39	0	41.23	0.92	0	0	0	0	8.31	0	0	0	0	0	0	0
L2003	0	0	0	0	0	0	0	7.42074	1.48015	0	0.590059	0.30003	0	0	0	10.6811	0	37.9838	0	32.3432	0	0	0	0	0	8.90089	0	0	0	0	0	0	0.30003
L2004	0	0	0	0	0	0	0.519948	6.21938	2.58974	0	0	0.519948	0	0	0	5.69943	0	20.7279	0	44.5555	0	0	0	0	0	19.1681	0	0	0	0	0	0	0
L2005	0	0	0	0.909909	0	0	2.26977	19.548	1.81982	0	0.909909	0	0	0	0	4.54955	0	43.6356	0	24.0876	0	0	0	0.909909	0	1.35986	0	0	0	0	0	0	0
L2006	0	0.290029	0	0.290029	0	0	0.290029	39.4139	1.18012	0	0.290029	0	0	0	0	4.12041	0	35.5936	0	16.1816	0	0	0	0	0	2.06021	0.290029	0	0	0	0	0	0
L2008	0	0	0	0	0	0	0	5	3.75	0	0	0	0	0	0	23.75	0	35	0	32.5	0	0	0	0	0	0	0	0	0	0	0	0	0
L2009	0	0	0	0.75	0	0	0	3.77	3.02	0	1.51	0.38	0	0	0	23.77	0	22.27	0	38.49	0	1.51	0	0	0	4.53	0	0	0	0	0	0	0
L2023	0	0	0	0	0	0	0	0	1.55984	0	0.939906	0	0	0	0	1.55984	0	37.8162	0	54.6845	0	0	0	0	0	3.12969	0	0	0	0	0	0	0.309969
L2024	0	0	0	0	0	0	0	2.33	0.29	0	0.29	0	0	0	0	0.29	0	42.44	0	50.29	0	0	0	0	0	3.78	0	0	0	0	0.29	0	0
L2025	0	0.380076	0	0	0	0.380076	0.380076	37.6975	22.3145	0	0.770154	0.770154	0	0	0	2.69054	0	13.8428	0	0	0	0	0	0	0	20.7742	0	0	0	0	0	0	0
D2026	0	0	0	0	0	0	0.489902	0.489902	0	0	0	0	0	0	0	0	0	16.0168	0.489902	82.0236	0	0	0	0	0	0.489902	0	0	0	0	0	0	0
D2027	0	0.390039	0	0.390039	0	0	0	0.780078	1.57016	0.390039	1.18012	0.390039	0	0	0	1.57016	0	51.3751	0.780078	40.004	0	0	0	0	0	0	0	0	0	0	1.18012	0	0
B2028	0	0	0.890089	0	0	1.79018	0	28.5729	37.5038	0	0.890089	1.79018	0	0	0	0	0	5.35054	0	23.2123	0	0	0	0	0	0	0	0	0	0	0	0	0
B2029	0	0.59994	0	0	0	0	0	0	0	0	0	0	0	0	0	0	0	42.5157	0	56.8843	0	0	0	0	0	0	0	0	0	0	0	0	0
B2030	0	0	0	0	0	0	0	0.389961	0.389961	0	0	0	0	0	0	1.55984	0	46.6953	0	50.5749	0	0	0	0	0	0	0.389961	0	0	0	0	0	0
B2031	0	0	0	0	0	0	0	1.75018	0.350035	0	0	0	0	0	0	1.75018	0	47.7248	0.350035	47.7248	0	0	0	0	0	0	0	0	0	0	0.350035	0	0
S2032	0	0	0	0.850255	0	0	0	2.56077	1.14034	0	0.280084	0	0	0	0.280084	2.56077	0	62.4087	0	29.6389	0	0	0	0	0	0	0	0	0	0	0.280084	0	0
S2033	0	0	0	0	0	0	0	0	0	0	0	0	0	0	0	0	0	45.37	0	54.63	0	0	0	0	0	0	0	0	0	0	0	0	0
L2034	0	0.469906	0.469906	0.469906	0	0	2.34953	55.3889	4.22915	0	0	0	0	0	0	2.34953	0	12.2076	0	21.5957	0	0	0	0	0	0	0	0	0	0	0.469906	0	0
G2041	0.680068	0	0	0	0	0	0	1.70017	1.36014	0	1.0201	1.0201	0	0	0	8.84088	0	26.1926	0	49.665	2.72027	1.70017	0	0	0	3.74037	0	0	0	0	1.36014	0	0
G2042	0.970097	2.27023	0	0	0	0	0	22.6523	33.6634	0	3.56036	1.94019	0	0	0.320032	11.6512	0	6.15062	0	16.5017	0	0.320032	0	0	0	0	0	0	0	0	0	0	0
G2043	0	0	0	0	0	0	0	0	0.930093	0	0	0	0	0	0	3.74037	0	46.7247	0	43.9344	0	1.87019	0	0	0	0.930093	0	0	0	0	0	1.87019	0
D2046	0	0	0	0.93	0	0	0	0.93	2.16	0	0.62	0	0	0	0	3.7	0	47.53	1.54	40.43	0	1.85	0	0	0	0.31	0	0	0	0	0	0	0
L2047	0	0	0	0	0	0	0	0	1.69	0	0	0	0	0	0	0	0	51.69	0	44.92	0	0.85	0	0	0	0	0	0	0	0	0	0.85	0
L2069	0	0	0	0.629874	0	0	0.939812	26.2448	8.12837	0	2.4995	0	0	0	0	19.996	0	27.8044	1.55969	7.80844	0	0.629874	0	0	0	0.629874	0	0	0	0	0	0.629874	2.4995
L2070	0	0	0	0	0	0	0.31	32.11	4.89	0	0.31	0	0	0	0	10.7	0	45.26	0	3.36	0.31	0.61	0	0	0	0.92	0	0	0	0	0	0	1.22
L2072	0	0.60012	0	0.60012	0.30006	0	0	50.3101	6.63133	0	0.60012	0.30006	0	0	0	12.9526	0	14.1628	1.20024	5.42108	0	0.60012	0	0	0	3.31066	1.20024	0	0	0	0.30006	0	1.5103
L2073	0	0.29	0	0.87	0	0	0.87	68.51	2.04	0	0	0	0	0	0.29	3.21	0	10.21	1.17	9.04	0.29	1.17	0.29	0	0	1.75	0	0	0	0	0	0	0
L2075	0	0	0	0.59982	0	0	0	34.6196	3.57893	0	0.29991	0	0	0	0.89973	18.8044	0	31.9404	0	6.26812	0.29991	1.78946	0	0	0	0.59982	0.29991	0	0	0	0	0	0
L2077	0	0	0	0	0	0	0	0.84	1.67	0	0.84	0	0	0	0	15.48	0	57.74	0.42	20.92	0	0	0	0	0	2.09	0	0	0	0	0	0	0
L2078	0	0	0	0	0	0	0.319968	1.26987	0	0	0.629937	0	0	0	0	7.93921	0	52.6947	0.319968	35.2365	0	0	0	0	0	1.58984	0	0	0	0	0	0	0
L2079	0	0	0	0	0	0	0	5.94	1.25	0	0.31	0	0	0	0	15.31	0	53.44	0	22.81	0	0	0	0	0	0.94	0	0	0	0	0	0	0
L2080	0	0	0	0	0	0	0	2.74055	2.05041	0	0	0.680136	0	0	0	5.4811	0	52.4005	0.680136	32.1964	0	0	0	0	0	3.77075	0	0	0	0	0	0	0
L2081	0	0	0	0	0	0	0	2.65027	0.330033	0	0	0	0	0	0.330033	19.2119	0	51.6552	0	24.5025	0	0	0	0	0	1.32013	0	0	0	0	0	0	0
L2082	0	0	0	0.3	0	0	0.3	4.23	14.2	0	1.21	0.91	0	0	0.3	6.65	0	52.87	0	14.5	0.3	1.51	0	0	0	2.72	0	0	0	0	0	0	0
L2083	0	0	0	0	0	0	0.29	4.71	0.59	0	2.06	0.59	0	0	0.88	20.29	0	35.59	0	32.06	0.29	0	0	0	0	2.65	0	0	0	0	0	0	0
B2084	0	0	0	0	0	0	0	0.330033	1.0001	0	2.34023	2.0102	0	0	1.34013	13.7114	0	48.8349	0	27.4227	0.330033	0	0	0	0	2.68027	0	0	0	0	0	0	0
B2085	0	0	0	0	0	0	0	7.77922	0.559944	0	1.10989	0	0	0	1.10989	6.10939	0	64.4436	0	16.6683	0	0	0	0	0	2.21978	0	0	0	0	0	0	0
L2109	0	0	0	0.410082	0	0	0	12.0324	8.30166	0	1.24025	0	0	0	0	0	0	57.6815	0	19.924	0	0	0	0	0	0.410082	0	0	0	0	0	0	0
L2110	0	0	0	0	0	0	1.01	11.34	10.33	0	0.25	0	0	0	0	0.5	0	45.08	0.25	30.48	0	0	0	0	0	0.76	0	0	0	0	0	0	0
L2111	0	0	0	0	0	0	0.220022	22.3922	11.7512	0	0.220022	0.220022	0	0	0	2.88029	0	42.3542	0	17.5218	0	0	0	0	0	2.44024	0	0	0	0	0	0	0
L2115	0	0.260026	0	0.520052	0	0	0.790079	37.1737	56.0256	0	0.260026	1.83018	0	0	0	0.260026	0	0.520052	0	2.36024	0	0	0	0	0	0	0	0	0	0	0	0	0
L2117	0	0	0	1.94	0	0	2.43	48.06	11.17	0	0	0.97	0	0	0	1.94	0	10.19	0.49	20.87	0	0	0	0	0	1.94	0	0	0	0	0	0	0
L2118	0	0	0	0.790079	0	0	0	5.51055	1.57016	0	0	0	0	0	0	2.36024	0	59.846	0.790079	29.1329	0	0	0	0	0	0	0	0	0	0	0	0	0
L2119	0	0	0	0.390117	0.190057	0	1.93058	47.5943	11.8035	0	0	0.190057	0	0	0.190057	1.74052	0	14.3143	0	17.9954	0	0.770231	0	0	0	1.93058	0.770231	0	0	0	0.190057	0	0
L2128	0	0	0	0	0	0	0	0	0	0	0	0	0	0	0	0	0	46.6647	10.001	43.3343	0	0	0	0	0	0	0	0	0	0	0	0	0
L2142	0	0.60006	0.30003	2.10021	0	0	1.20012	49.555	37.5438	0	1.20012	3.30033	0	0	0.60006	2.40024	0	0	0	0.90009	0	0	0	0	0	0.30003	0	0	0	0	0	0	0
B2158	0	0.52	0	0	0.52	0	0	51.04	7.81	0	0	0	0	0	0	5.21	0	15.63	0	13.54	0	0.52	0	0	0	4.17	1.04	0	0	0	0	0	0
B2161	0	0.819918	0	0	0	0	0	2.44976	4.48955	0	6.52935	3.26967	0	0	0	19.1781	0	11.8388	0	44.8955	0	0	0	0	0	6.52935	0	0	0	0	0	0	0
L2164	0	0	0	0	0	0	0	0	1.96039	0	0.65013	0.65013	0	0	0.65013	0.65013	0	66.0232	0	25.4951	0	0	0	0	0	3.92078	0	0	0	0	0	0	0
L090	0	0.30003	0	0.40004	0	0	1.20012	65.1665	10.141	0	0.20002	0	0	0	0	11.4511	0.20002	0	0	2.91029	0	0.20002	0	0	0	5.0205	1.91019	0	0	0	0.90009	0	0
L091	0	0.64	0.32	0.16	0	0	1.29	28.3	45.02	0	1.13	2.57	0	0	0	15.92	0	0	0	3.05	0	0	0	0	0	0.96	0.32	0	0	0	0.32	0	0
L092	0.179964	0.879824	0	0.179964	0.34993	0	0	16.9866	48.5003	0	1.22975	3.84923	0	0	0	25.7349	0	0	0	0.879824	0	0	0	0	0	0	0.529894	0	0	0	0.69986	0	0
A099	0	0.220928	0.220928	0	0	0	0.873669	30.0362	36.182	0	0.441856	1.0946	0	0	0.441856	21.2693	0	0	0	6.13577	0	0	0	0	0	1.75738	0.662784	0	0	0	0.662784	0	0
A100	0	0.27065	0	0	0	0	1.86447	39.6151	40.9483	0	1.3332	0	0	0	0.541299	6.64595	0	0	0	5.5834	0	0	0	0	0	2.92702	0.27065	0	0	0	0	0	0
A103	0	0.462033	0.110486	0	0	0	0.462033	12.8465	74.6485	0	1.48654	3.21414	0	0	0.693049	3.66613	0	0	0	1.37605	0	0	0	0	0	0.462033	0.231016	0	0	0	0.341503	0	0
A104	0	1.34673	0	0	0	0	0	26.0126	48.8864	0	0.901274	0.445457	0	0	0.890915	1.79219	0	0	0	12.5557	0	1.34673	0	0	0	5.37657	0.445457	0	0	0	0	0	0
A105	0	0	0	0.390078	0	0	1.17023	71.5543	6.82136	0	0.190038	0	0	0	0	13.2627	0.390078	0	0	1.17023	0	0	0	0	0	4.67093	0.190038	0	0	0	0.190038	0	0
A106	0	0.250627	0	0	0	0	1.78446	24.6817	50.6366	0	1.52381	1.78446	0	0	0.501253	3.05764	0	0	0	8.14035	0	0	0	0	0	5.59398	1.02256	0	0	0	1.02256	0	0
A107	0	0	0	0	0.291751	0	1.167	44.165	41.8209	0.291751	1.45875	1.45875	0	0	1.167	2.04225	0	0	0	4.09457	0	0	0	0	0	0.583501	1.45875	0	0	0	0	0	0
A108	0	0	0	0	0.391527	0	1.96767	45.2766	23.6221	0	0.783054	0	0	0	1.96767	0	0	0.391527	0	17.7191	0	0	0	0	0	1.57615	5.11997	0	0	0	1.18462	0	0
A127	0	0.300933	1.82566	0	2.13662	0.300933	3.04945	59.7552	28.9698	0	1.22379	0	0	0.611897	0.300933	0	0	0	0	0.611897	0	0	0	0	0	0	0.91283	0	0	0	0	0	0
L151	0	0.690138	2.07041	6.55131	0.690138	0	6.21124	52.4205	14.4829	0	0	1.03021	0	0	0	2.07041	0	1.72034	0	11.7223	0	0	0	0	0	0	0	0	0	0	0.340068	0	0
L153	0	0.59994	0.119988	0.239976	0.119988	0	0.119988	23.1477	47.8452	0	0.119988	3.57964	0	0	0	19.928	0	0.119988	0	3.33967	0	0.119988	0	0	0	0.359964	0.119988	0	0	0	0.119988	0	0
A168	0	0.610061	0	0	0	0	0.150015	17.5318	72.1072	0	0.460046	5.64056	0	0	0	3.05031	0	0	0	0.30003	0	0	0	0	0	0.150015	0	0	0	0	0	0	0
A171	0	1.0002	0	0	0.660132	0	2.66053	40.8682	13.9528	0	3.65073	0.330066	0	0.330066	0	7.97159	0	0	0	23.9248	0	0	0	0	0	0.660132	0	0	0	0	3.9908	0	0
A174	0.33	0.33	0	0.33	1	0	2.99	20.93	58.8	0	2.66	0	0	0.33	0	3.99	0	0	0	7.31	0	0	0	0	0	0	0	0	0	0	1	0	0
A175	0	0.739852	0.739852	0.739852	8.81824	0	2.20956	69.1062	8.81824	0	1.46971	1.46971	0	0	0	0	0	0	0	0	0	0	0	0	0	0	5.14897	0	0	0	0.739852	0	0
L178	0	2.86	0	1.9	0.48	0	5.24	55.24	13.81	0	0	0	0	0	0	3.33	0	4.76	0	10.95	0	0	0	0	0	0.95	0.48	0	0	0	0	0	0
A533	0	0.510051	0	0.760076	0	0	0	23.4123	29.773	0	0.250025	1.27013	0	0	1.53015	42.4942	0	0	0	0	0	0	0	0	0	0	0	0	0	0	0	0	0
A534	0	0	0	0.330033	0	0	0	25.0825	7.36074	0	0	0	0	0	0	20.402	0	31.1031	0	14.7215	0	0	0	0	0	0.670067	0	0	0	0	0.330033	0	0
C1955	0	1.97632	0	0	0	0	3.94262	49.0068	15.7905	0	0.983146	0	0.331059	0	0	1.97632	0	8.22632	0	15.7905	0	0	0	0	0	1.97632	0	0	0	0	0	0	0
L2076	0	0	0	0	0	0	0	13.1113	3.61036	0	0.980098	0.330033	0	0	0	21.3121	0	48.8549	0.330033	10.491	0	0	0	0	0	0.980098	0	0	0	0	0	0	0
L2116	0	1.91	0	1.27	1.27	0.64	4.46	33.76	27.39	0	1.27	0.64	0	0	0	0	0	9.55	0	17.2	0	0	0	0	0	0.64	0	0	0	0	0	0	0
L2150	0	0	0	0	0	0	1.25013	15.9916	4.39044	0	0.310031	0.310031	0	0	0	15.6716	0	52.0452	0.310031	6.90069	0	0	0	0	0	2.82028	0	0	0	0	0	0	0
L2160	0	0	0	0.4	0	0	0	19.2	51.2	0	4.4	2	0	0	0.4	8.8	0	11.6	0	2	0	0	0	0	0	0	0	0	0	0	0	0	0
A2165	0	0	0	0.710083	0	0	0.355042	33.9318	47.5046	0	1.07527	3.92575	0	0	1.78535	0.355042	0	0	0	8.57172	0	0	0	0	0	1.43031	0	0.355042	0	0	0	0	0
L2166	0	0.740074	0.740074	1.49015	0	0	0	30.8631	47.9648	0	0.740074	2.9703	0	0	0.370037	1.12011	0.370037	0.370037	0	11.5212	0	0	0	0	0	0.370037	0	0	0	0	0.370037	0	0
L2167	0	0.311965	0	0.633994	0	0	0.311965	50.79	37.8585	0	0.311965	3.47187	0	0	0.311965	0.633994	0	0	0	2.83788	0	0	0	0	0	2.52591	0	0	0	0	0	0	0
L2168	0	0	0	1.72034	0	0	0	47.2494	36.9074	0	0.690138	2.41048	0	0	1.72034	2.41048	0	0.340068	0	4.83097	0	0	0	0	0	1.38028	0	0	0	0	0	0	0.340068
