# Supplementary material for: Disentangling environmental drivers of subarctic dinocyst assemblage compositional change during the Holocene
Source: Copernicus journal article supplement (doi:10.5194/cp-19-2027-2023), 2023-10-26
Supplement: Supplementary file 2 [file cp-19-2027-2023-supplement.zip]

Archive with 3 entries (3 files):
- S1_Dataset421.xlsx
- Supplementary_material_for.submission.pdf
- cp-19-2027-2023-supplement-title-page.pdf
