# Supplementary material for: Disentangling environmental drivers of subarctic dinocyst assemblage compositional change during the Holocene
Source: Copernicus journal article supplement (doi:10.5194/cp-19-2027-2023), 2023-10-26
Supplement: Supplementary file 2 [file cp-19-2027-2023-supplement.zip › cp-19-2027-2023-supplement-title-page.pdf]

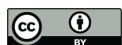

*Supplement of*

## **Disentangling environmental drivers of subarctic dinocyst assemblage compositional change during the Holocene**

**Sabrina Hohmann et al.**

*Correspondence to:* Sabrina Hohmann (hohmannlls@gmail.de)

- cp-19-2027-2023-supplement-title-page.pdf
- S1\_Dataset421.xlsx
- Supplementary\_material\_for.submission.pdf

The copyright of individual parts of the supplement might differ from the article licence.
